# Supplementary material for: Sex differences in pacing during ‘Ultraman Hawaii’
Source: PeerJ. 2016 Sep 27;4:e2509. doi: 10.7717/peerj.2509 (PMC5045888; doi:10.7717/peerj.2509)
Supplement: Supplemental Information 1 [file peerj-04-2509-s001.xls]

## Sheet: 1983-2015
Year of race	Name	Gender	genderr	Age	Swimming time	bike 1 day	bike 2 day	double marathon	overall time
1986	Masako Mandokoro	F	1	21	1899-12-31 02:16:04	1899-12-31 05:12:40	1899-12-31 07:24:03	1899-12-31 09:42:26	1899-12-31 22:19:54
1988	Manako Mizutani	F	1	28	1899-12-31 02:38:24	1899-12-31 05:26:18	1899-12-31 07:51:56	1899-12-31 10:01:34	1900-01-01 00:16:42
1988	Rosana Paukofe	F	1	29	1899-12-31 02:50:20	1899-12-31 05:14:50	1899-12-31 07:55:35	1899-12-31 07:01:06	1899-12-31 22:39:21
1986	Eiko Endo	F	1	36	1899-12-31 03:14:52	1899-12-31 05:48:01	1899-12-31 07:55:59	1899-12-31 06:43:15	1899-12-31 23:42:07
1989	Tina Bischoff	F	1	31	1899-12-31 03:36:51	1899-12-31 05:02:20	1899-12-31 08:02:57	1899-12-31 07:32:12	1900-01-01 00:14:20
1985	Ardis Bow	F	1	29	1899-12-31 02:47:36	1899-12-31 05:31:28	1899-12-31 08:08:28	1899-12-31 08:29:40	1900-01-01 00:57:12
1989	Ardis Bow	F	1	33	1899-12-31 03:38:53	1899-12-31 05:16:03	1899-12-31 08:08:59	1899-12-31 08:40:17	1900-01-01 01:44:12
1989	Eva Vasquez	F	1	30	1899-12-31 04:26:40	1899-12-31 05:42:27	1899-12-31 08:12:08	1899-12-31 07:22:06	1900-01-01 01:43:21
1989	Kjaersti Floden	F	1	39	1899-12-31 03:34:22	1899-12-31 05:03:15	1899-12-31 08:14:29	1899-12-31 11:25:14	1900-01-01 01:27:01
1983	B Levenstein	F	1	40	1899-12-31 03:18:48	1899-12-31 05:38:12	1899-12-31 08:15:15	1899-12-31 08:27:45	1900-01-01 01:40:00
1989	Dody Burkey	F	1	45	1899-12-31 02:55:53	1899-12-31 05:21:18	1899-12-31 08:15:58	1899-12-31 10:02:24	1900-01-01 00:37:08
1989	Tracy Achelis	F	1	35	1899-12-31 04:26:59	1899-12-31 06:25:42	1899-12-31 08:16:55	1899-12-31 08:39:58	1900-01-01 03:49:34
1989	Elizabeth Schaeffe	F	1	45	1899-12-31 03:02:10	1899-12-31 06:09:39	1899-12-31 08:20:20	1899-12-31 11:15:10	1900-01-01 01:27:04
1989	Miyuki Shishido	F	1	30	1899-12-31 02:33:15	1899-12-31 06:17:21	1899-12-31 08:20:31	1899-12-31 07:10:49	1900-01-01 00:21:56
1989	Toshiko Yura	F	1	48	1899-12-31 03:27:39	1899-12-31 05:01:12	1899-12-31 08:22:03	1899-12-31 06:11:21	1899-12-31 23:02:15
1990	Angelika Castaneda	F	1	47	1899-12-31 04:49:41	1899-12-31 06:26:47	1899-12-31 08:33:14	1899-12-31 08:18:17	1900-01-01 04:07:59
1990	Barbara Alvarez	F	1	47	1899-12-31 03:17:41	1899-12-31 05:20:09	1899-12-31 08:36:46	1899-12-31 08:38:44	1900-01-01 01:53:20
1990	Lani Montgomery	F	1	36	1899-12-31 03:45:00	1899-12-31 05:32:08	1899-12-31 08:37:53	1899-12-31 08:07:46	1900-01-01 02:02:47
1990	Tracy Achelis	F	1	36	1899-12-31 03:11:30	1899-12-31 06:05:14	1899-12-31 08:39:58	1899-12-31 10:50:57	1900-01-01 03:13:29
1993	Hiroe Fukushima	F	1	25	1899-12-31 03:15:07	1899-12-31 05:49:16	1899-12-31 08:47:12	1899-12-31 08:06:21	1900-01-01 01:57:56
1995	Tracy Preston	F	1	25	1899-12-31 02:59:03	1899-12-31 06:46:31	1899-12-31 08:59:46	1899-12-31 08:55:44	1900-01-01 03:41:04
1997	Tracy Preston	F	1	27	1899-12-31 03:28:29	1899-12-31 05:35:43	1899-12-31 09:10:49	1899-12-31 07:21:06	1900-01-01 01:36:00
1998	Tracy Preston	F	1	28	1899-12-31 04:36:01	1899-12-31 05:56:29	1899-12-31 09:14:19	1899-12-31 09:07:05	1900-01-01 04:53:54
1986	Sherri Willis	F	1	38	1899-12-31 03:18:19	1899-12-31 06:14:17	1899-12-31 09:14:58	1899-12-31 08:32:36	1900-01-01 03:20:10
1998	Cecilia Ramos	F	1	39	1899-12-31 03:37:27	1899-12-31 06:29:44	1899-12-31 09:15:11	1899-12-31 07:58:23	1900-01-01 03:20:45
1998	Suzy Degazon	F	1	34	1899-12-31 03:25:54	1899-12-31 06:54:34	1899-12-31 09:18:51	1899-12-31 10:31:08	1900-01-01 06:10:27
1999	Linda Bialla	F	1	36	1899-12-31 03:55:29	1899-12-31 06:41:09	1899-12-31 09:24:02	1899-12-31 11:35:09	1900-01-01 04:53:19
2000	Monica Fernandez	F	1	32	1899-12-31 03:26:09	1899-12-31 06:48:54	1899-12-31 09:31:16	1899-12-31 10:21:09	1900-01-01 06:07:28
2000	Rachel Portner	F	1	46	1899-12-31 05:15:11	1899-12-31 06:07:59	1899-12-31 09:34:30	1899-12-31 09:23:37	1900-01-01 04:15:15
2001	Monica Fernandez	F	1	33	1899-12-31 04:11:39	1899-12-31 07:34:54	1899-12-31 09:37:29	1899-12-31 08:21:30	1900-01-01 05:45:32
1984	Marianne Tufteland	F	1	27	1899-12-31 03:14:06	1899-12-31 06:53:47	1899-12-31 09:40:21	1899-12-31 11:14:51	1900-01-01 07:03:05
2001	Suzy Degazon	F	1	37	1899-12-31 04:34:53	1899-12-31 06:43:17	1899-12-31 09:40:45	1899-12-31 08:58:42	1900-01-01 05:57:37
1984	Alice Unawai	F	1	41	1899-12-31 02:54:47	1899-12-31 06:56:57	1899-12-31 09:42:23	1899-12-31 09:16:17	1900-01-01 04:50:24
2001	Kelly Clancy	F	1	34	1899-12-31 02:51:40	1899-12-31 05:14:19	1899-12-31 09:42:57	1899-12-31 08:31:17	1900-01-01 02:20:13
2002	Conny Dauben	F	1	27	1899-12-31 04:12:00	1899-12-31 06:45:46	1899-12-31 09:44:07	1899-12-31 07:54:33	1900-01-01 04:36:26
2002	Linda Bialla	F	1	39	1899-12-31 04:13:05	1899-12-31 06:35:17	1899-12-31 09:45:13	1899-12-31 09:12:18	1900-01-01 05:45:53
2002	Marise Nunes	F	1	47	1899-12-31 03:00:54	1899-12-31 06:17:46	1899-12-31 09:45:21	1899-12-31 11:07:49	1900-01-01 06:11:50
2002	Hiroe Fukushima	F	1	34	1899-12-31 03:21:33	1899-12-31 06:47:03	1899-12-31 09:46:00	1899-12-31 07:04:07	1900-01-01 05:17:44
2003	Shanna Armstrong	F	1	29	1899-12-31 03:40:07	1899-12-31 07:05:08	1899-12-31 09:47:14	1899-12-31 09:17:47	1900-01-01 05:50:16
2003	Lauren Fithian	F	1	45	1899-12-31 04:10:43	1899-12-31 06:47:30	1899-12-31 09:49:28	1899-12-31 08:13:50	1900-01-01 07:38:07
2003	Suzy Degazon	F	1	39	1899-12-31 02:38:04	1899-12-31 08:00:37	1899-12-31 09:49:30	1899-12-31 09:42:12	1900-01-01 06:10:23
2004	Lauren Fithian	F	1	46	1899-12-31 03:32:05	1899-12-31 06:01:01	1899-12-31 09:57:02	1899-12-31 09:40:17	1900-01-01 05:10:25
2004	Suzy Degazon	F	1	40	1899-12-31 03:05:00	1899-12-31 06:42:03	1899-12-31 09:57:42	1899-12-31 09:34:15	1900-01-01 05:19:00
2005	Shanna Armstrong	F	1	31	1899-12-31 04:18:01	1899-12-31 06:25:39	1899-12-31 09:58:15	1899-12-31 11:37:58	1900-01-01 06:24:21
2005	Suzy Degazon	F	1	41	1899-12-31 03:33:14	1899-12-31 07:13:52	1899-12-31 10:02:50	1899-12-31 10:49:10	1900-01-01 07:39:06
2005	Jennifer Burtner	F	1	35	1899-12-31 02:58:08	1899-12-31 07:19:44	1899-12-31 10:02:59	1899-12-31 10:51:16	1900-01-01 07:12:07
2006	Suzy Degazon	F	1	42	1899-12-31 03:43:48	1899-12-31 07:43:40	1899-12-31 10:04:00	1899-12-31 09:15:07	1900-01-01 06:46:35
2006	Shanna Armstrong	F	1	32	1899-12-31 03:26:04	1899-12-31 05:58:32	1899-12-31 10:04:59	1899-12-31 09:09:54	1900-01-01 04:39:29
2006	Elizabeth Thompson	F	1	54	1899-12-31 03:12:13	1899-12-31 07:25:21	1899-12-31 10:06:45	1899-12-31 12:16:07	1900-01-01 09:00:26
2007	Ann Heaslett	F	1	45	1899-12-31 04:15:07	1899-12-31 07:15:19	1899-12-31 10:10:08	1899-12-31 09:10:36	1900-01-01 06:51:10
2007	Shanna Armstrong	F	1	33	1899-12-31 04:02:59	1899-12-31 05:56:34	1899-12-31 10:10:13	1899-12-31 09:17:13	1900-01-01 05:26:59
2007	Iona MacKenzie	F	1	35	1899-12-31 04:15:55	1899-12-31 07:20:28	1899-12-31 10:10:40	1899-12-31 12:25:35	1900-01-01 10:12:38
2007	Suzy Degazon	F	1	43	1899-12-31 03:17:50	1899-12-31 06:24:42	1899-12-31 10:12:09	1899-12-31 08:46:27	1900-01-01 03:50:16
2007	Vanuza Maciel	F	1	37	4:01:25	5:06:35	1899-12-31 10:12:28	6:52:08	1900-01-01 02:12:36
2007	Michele Santilhano	F	1	37	1899-12-31 03:23:49	1899-12-31 07:01:07	1899-12-31 10:14:00	1899-12-31 09:34:51	1900-01-01 06:13:47
2008	Shanna Armstrong	F	1	34	1899-12-31 04:16:38	1899-12-31 07:20:06	1899-12-31 10:19:41	1899-12-31 11:32:14	1900-01-01 09:28:39
2008	Suzy Degazon	F	1	44	1899-12-31 04:03:56	1899-12-31 07:24:14	1899-12-31 10:21:18	1899-12-31 09:24:12	1900-01-01 07:13:40
2008	Catherine Paulson	F	1	41	1899-12-31 03:42:55	1899-12-31 06:38:00	1899-12-31 10:25:54	1899-12-31 11:09:05	1900-01-01 07:55:54
2009	Shanna Armstrong	F	1	35	3:17:31	5:30:31	1899-12-31 10:28:01	9:58:08	1900-01-01 05:14:11
2009	Kathy Winkler	F	1	43	1899-12-31 04:25:47	1899-12-31 06:37:36	1899-12-31 10:28:18	1899-12-31 06:13:46	1900-01-01 08:39:46
2009	Ann Heaslett	F	1	46	1899-12-31 03:47:05	1899-12-31 06:45:39	1899-12-31 10:29:20	1899-12-31 09:38:01	1900-01-01 06:40:05
2009	Trix Zgraggen	F	1	43	1899-12-31 04:06:28	1899-12-31 06:52:29	1899-12-31 10:30:14	1899-12-31 10:59:35	1900-01-01 08:32:48
2009	Kimberlee Rouse	F	1	54	1899-12-31 04:25:52	1899-12-31 06:49:18	1899-12-31 10:32:58	1899-12-31 09:00:32	1900-01-01 08:32:19
2009	Sheena Miller	F	1	26	1899-12-31 03:23:56	1899-12-31 07:15:55	1899-12-31 10:34:34	1899-12-31 09:19:01	1900-01-01 06:32:42
2009	Kathy Laska	F	1	36	1899-12-31 03:36:42	1899-12-31 07:19:58	1899-12-31 10:34:52	1899-12-31 06:46:28	1900-01-01 06:18:37
2009	Laurie Beers	F	1	55	1899-12-31 03:12:39	1899-12-31 07:34:50	1899-12-31 10:35:35	1899-12-31 08:02:27	1900-01-01 05:25:31
2009	Suzy Degazon	F	1	45	2:45:50	5:22:46	1899-12-31 10:36:23	9:54:43	1900-01-01 04:39:42
2009	Toni Barstis	F	1	43	1899-12-31 03:34:06	1899-12-31 07:49:40	1899-12-31 10:36:56	1899-12-31 08:12:31	1900-01-01 09:06:28
1983	Ardis Bow	F	1	27	1899-12-31 03:46:03	1899-12-31 07:56:09	1899-12-31 10:38:08	1899-12-31 11:03:06	1900-01-01 09:23:26
2010	Amber Monforte	F	1	32	1899-12-31 03:56:04	1899-12-31 07:11:16	1899-12-31 10:41:40	1899-12-31 08:52:39	1900-01-01 08:08:38
2010	Hillary Biscay	F	1	32	1899-12-31 04:36:11	1899-12-31 07:16:41	1899-12-31 10:42:43	1899-12-31 08:13:50	1900-01-01 06:49:25
2010	Shanna Armstrong	F	1	36	1899-12-31 02:55:40	1899-12-31 03:54:25	1899-12-31 10:43:31	1899-12-31 09:24:09	1900-01-01 02:57:45
2010	Kathy Winkler	F	1	44	1899-12-31 03:43:10	1899-12-31 07:26:16	1899-12-31 10:45:25	1899-12-31 08:35:53	1900-01-01 06:30:44
2010	Megumi Kobayashi	F	1	37	1899-12-31 04:37:45	1899-12-31 07:27:03	1899-12-31 10:46:50	1899-12-31 09:08:06	1900-01-01 07:59:44
2010	Kimberlee Rouse	F	1	55	1899-12-31 03:58:07	1899-12-31 07:08:05	1899-12-31 10:48:15	1899-12-31 11:18:19	1900-01-01 09:12:46
2010	Vanuza Maciel	F	1	40	1899-12-31 03:32:31	1899-12-31 07:25:27	1899-12-31 10:48:59	1899-12-31 09:06:06	1900-01-01 06:53:03
2010	Laurie Beers	F	1	56	1899-12-31 04:18:28	1899-12-31 06:37:59	1899-12-31 10:49:51	1899-12-31 09:41:27	1900-01-01 07:27:45
2010	Suzy Degazon	F	1	46	1899-12-31 03:48:19	1899-12-31 08:07:14	1899-12-31 10:50:29	1899-12-31 10:34:46	1900-01-01 09:20:48
2010	Wendy Minor	F	1	65	4:26:15	7:34:15	1899-12-31 10:51:52	1899-12-31 11:43:57	1900-01-01 10:36:19
2011	Amber Monforte	F	1	33	1899-12-31 03:46:30	1899-12-31 08:00:07	1899-12-31 10:53:46	1899-12-31 08:22:13	1900-01-01 09:11:33
2011	Vanuza Maciel	F	1	41	1899-12-31 04:46:01	1899-12-31 07:12:01	1899-12-31 10:56:02	1899-12-31 11:44:22	1900-01-01 10:38:26
2011	Alice Robb	F	1	33	1899-12-31 04:34:12	1899-12-31 06:51:00	1899-12-31 10:58:21	1899-12-31 11:19:06	1900-01-01 09:42:00
2011	Consuela Lively	F	1	40	4:00:02	5:15:58	1899-12-31 10:58:27	7:45:07	1900-01-01 03:59:34
2011	Kimmie Rouse	F	1	56	1899-12-31 03:28:42	1899-12-31 06:37:51	1899-12-31 10:59:08	1899-12-31 11:11:57	1900-01-01 08:17:38
2011	Laurie Beers	F	1	57	1899-12-31 02:26:20	1899-12-31 07:07:16	1899-12-31 11:02:11	1899-12-31 08:36:47	1900-01-01 06:51:28
2011	Kathy Laska	F	1	38	1899-12-31 05:08:31	1899-12-31 07:55:36	1899-12-31 11:02:21	1899-12-31 12:49:03	1900-01-01 12:55:31
2011	Susan Smith-nixon	F	1	43	1899-12-31 04:26:49	1899-12-31 07:20:53	1899-12-31 11:03:00	1899-12-31 12:22:56	1900-01-01 11:13:38
2012	Amber Monforte	F	1	34	1899-12-31 04:01:23	1899-12-31 06:49:20	1899-12-31 11:05:19	1899-12-31 10:56:10	1900-01-01 08:52:12
2012	Kathy Winkler	F	1	46	1899-12-31 04:57:35	1899-12-31 07:02:25	1899-12-31 11:06:31	1899-12-31 11:13:21	1900-01-01 10:19:52
2012	Yasuko Miyazaki	F	1	35	1899-12-31 03:28:52	1899-12-31 07:26:26	1899-12-31 11:07:36	1899-12-31 07:58:55	1900-01-01 09:27:35
2012	Tracey McQuair	F	1	37	1899-12-31 04:45:38	1899-12-31 08:11:35	1899-12-31 11:13:52	1899-12-31 09:25:13	1900-01-01 09:36:18
2012	Joni Moore	F	1	46	1899-12-31 04:54:35	1899-12-31 07:24:05	1899-12-31 11:14:04	1899-12-31 10:27:58	1900-01-01 10:00:42
1984	Lyn Brooks	F	1	36	1899-12-31 03:22:01	1899-12-31 07:50:34	1899-12-31 11:15:20	1899-12-31 09:52:36	1900-01-01 08:20:31
2012	Katherine Calder-Becker	F	1	48	3:41:47	5:43:13	1899-12-31 11:16:18	1899-12-31 11:31:29	1900-01-01 08:12:47
2012	Ingrid Hillhouse	F	1	39	1899-12-31 04:18:32	1899-12-31 06:37:55	1899-12-31 11:17:39	1899-12-31 09:17:15	1900-01-01 07:31:21
2013	Hillary Biscay	F	1	35	3:25:49	5:52:18	1899-12-31 11:19:06	8:32:23	1900-01-01 05:09:36
2013	Amber Monforte	F	1	35	1899-12-31 04:44:19	1899-12-31 07:14:56	1899-12-31 11:25:40	1899-12-31 07:27:44	1900-01-01 09:05:24
2013	Vanuza Maciel	F	1	43	1899-12-31 03:39:57	1899-12-31 07:56:41	1899-12-31 11:26:00	1899-12-31 09:42:25	1900-01-01 09:11:31
2013	Beth Brewster	F	1	43	1899-12-31 03:19:20	1899-12-31 06:06:47	1899-12-31 11:30:40	1899-12-31 10:28:21	1900-01-01 07:25:00
2013	Kathleen Wood	F	1	44	1899-12-31 03:25:35	1899-12-31 06:59:36	1899-12-31 11:32:02	1899-12-31 10:19:28	1900-01-01 08:16:41
2013	Dene Sturm	F	1	49	1899-12-31 04:40:59	1899-12-31 07:57:44	1899-12-31 11:32:34	1899-12-31 12:36:18	1900-01-01 12:47:35
2013	Laurie Beers	F	1	59	1899-12-31 03:12:16	1899-12-31 07:23:48	1899-12-31 11:34:22	1899-12-31 08:35:13	1900-01-01 08:52:51
2014	Yasuko Miyazaki	F	1	37	1899-12-31 04:31:48	1899-12-31 07:28:12	1899-12-31 11:40:26	1899-12-31 09:45:58	1900-01-01 09:26:44
2014	Julie Shelley	F	1	38	1899-12-31 05:07:57	1899-12-31 07:04:31	1899-12-31 11:42:44	1899-12-31 08:48:16	1900-01-01 08:43:28
2014	Kathy Winkler	F	1	48	1899-12-31 03:54:57	1899-12-31 07:26:26	1899-12-31 11:43:16	1899-12-31 09:47:46	1900-01-01 09:33:56
2014	Meredith Terranova	F	1	40	1899-12-31 03:25:01	1899-12-31 07:49:32	1899-12-31 11:48:29	1899-12-31 11:29:10	1900-01-01 10:32:12
2014	Sylvia Ravaglia	F	1	37	1899-12-31 04:20:43	1899-12-31 07:38:48	1899-12-31 11:52:00	1899-12-31 10:17:32	1900-01-01 10:09:03
2014	Vanuza Maciel	F	1	44	1899-12-31 05:48:45	1899-12-31 07:47:46	1899-12-31 11:56:19	1899-12-31 11:36:50	1900-01-01 13:09:40
2014	Iona Mackenzie	F	1	42	4:09:55	6:05:32	1899-12-31 11:56:53	9:36:29	1900-01-01 07:48:49
2014	Kat Calder-becker	F	1	50	1899-12-31 05:18:20	1899-12-31 08:45:33	1899-12-31 12:01:01	1899-12-31 11:07:11	1900-01-01 13:12:05
2014	Laurie Beers	F	1	60	1899-12-31 05:04:01	1899-12-31 09:14:54	1899-12-31 12:10:43	1899-12-31 09:10:43	1900-01-01 11:40:21
2014	Dene Sturm	F	1	50	1899-12-31 03:46:39	1899-12-31 07:16:16	1899-12-31 12:14:04	1899-12-31 11:51:00	1900-01-01 11:07:59
2015	Staci Studer	F	1	42	1899-12-31 05:01:00	1899-12-31 08:07:29	1899-12-31 12:47:19	1899-12-31 09:59:36	1900-01-01 11:55:24
2015	Katherine Calder-becker	F	1	51	1899-12-31 03:11:45	1899-12-31 04:16:11	1899-12-31 13:03:59	1899-12-31 11:18:03	1900-01-01 07:49:58
2015	Beth Brewster	F	1	45	1899-12-31 03:36:22	1899-12-31 04:40:44	1899-12-31 13:23:44	1899-12-31 13:23:53	1900-01-01 11:04:43
2015	Iona Mackenzie	F	1	43	1899-12-31 04:00:00	1899-12-31 10:49:41	1899-12-31 14:37:32	1899-12-31 12:01:41	1900-01-01 17:28:54
2015	Kimmie Rouse	F	1	60	1899-12-31 05:35:37	1899-12-31 09:34:35	1899-12-31 15:47:50	1899-12-31 09:36:45	1900-01-01 16:34:47
1999	Suzy Degazon	F	1	35	2:31:15	5:55:46	9:28:32	9:07:19	1900-01-01 03:02:52
2001	Lauren Fithian	F	1	43	3:27:20	5:35:38	9:40:14	9:20:16	1900-01-01 04:03:28
2002	Suzy Degazon	F	1	38	3:06:32	5:10:34	9:46:01	8:47:43	1900-01-01 02:50:50
1983	S Vos	M	2	31	1899-12-31 02:56:11	1899-12-31 04:49:59	1899-12-31 07:10:06	1899-12-31 06:48:02	1899-12-31 21:44:18
1986	Michael Moore	M	2	38	1899-12-31 03:17:54	1899-12-31 05:23:15	1899-12-31 07:20:13	1899-12-31 06:13:46	1899-12-31 22:15:08
1986	Yasuo Shimoda	M	2	48	1899-12-31 03:12:00	1899-12-31 05:01:25	1899-12-31 07:20:41	1899-12-31 09:08:23	1899-12-31 21:49:38
1986	Yashushi Kameyama	M	2	29	1899-12-31 02:43:25	1899-12-31 05:05:43	1899-12-31 07:26:25	1899-12-31 09:59:34	1899-12-31 22:21:54
1986	Cowman A-Moo-Ha	M	2	42	1899-12-31 03:19:58	1899-12-31 05:18:03	1899-12-31 07:27:27	1899-12-31 09:12:13	1899-12-31 23:38:48
1986	Paul Fabish	M	2	27	1899-12-31 03:15:36	1899-12-31 05:07:44	1899-12-31 07:29:20	1899-12-31 07:26:59	1899-12-31 23:19:39
1988	Gary Shields	M	2	33	1899-12-31 02:53:42	1899-12-31 05:14:56	1899-12-31 07:30:35	1899-12-31 09:30:06	1899-12-31 22:10:12
1984	Michael Moore	M	2	36	1899-12-31 02:38:50	1899-12-31 05:28:33	1899-12-31 07:31:23	1899-12-31 06:32:59	1899-12-31 22:11:45
1988	William Woodruff	M	2	39	1899-12-31 03:35:03	1899-12-31 05:00:00	1899-12-31 07:31:50	1899-12-31 09:05:23	1900-01-01 00:40:38
1988	Steve Hare	M	2	31	1899-12-31 02:14:43	1899-12-31 04:38:52	1899-12-31 07:33:36	1899-12-31 06:13:46	1899-12-31 21:41:49
1988	Premananda Childs	M	2	43	1899-12-31 02:26:21	1899-12-31 04:42:36	1899-12-31 07:34:16	1899-12-31 11:41:57	1899-12-31 21:59:44
1988	Gerry Van De Wint	M	2	50	1899-12-31 02:30:17	1899-12-31 05:15:53	1899-12-31 07:35:50	1899-12-31 06:19:22	1899-12-31 21:41:22
1988	Shigeru Kaneko	M	2	28	1899-12-31 03:04:06	1899-12-31 05:04:22	1899-12-31 07:36:28	1899-12-31 08:33:20	1899-12-31 22:31:54
1988	Kiyoshi Wakatsuki	M	2	34	1899-12-31 03:13:56	1899-12-31 05:14:57	1899-12-31 07:36:55	1899-12-31 06:45:24	1899-12-31 22:51:12
1988	James Budde	M	2	43	1899-12-31 02:14:49	1899-12-31 05:07:43	1899-12-31 07:39:05	1899-12-31 07:44:50	1899-12-31 22:46:27
1988	Klaus Haetzel	M	2	47	1899-12-31 02:46:49	1899-12-31 05:07:06	1899-12-31 07:43:31	1899-12-31 08:02:50	1900-01-01 00:16:45
1988	William Garrels	M	2	28	1899-12-31 03:15:08	1899-12-31 05:22:27	1899-12-31 07:43:33	1899-12-31 09:15:25	1899-12-31 22:35:24
1988	Toshihiko Adachi	M	2	32	1899-12-31 02:56:39	1899-12-31 04:50:19	1899-12-31 07:44:23	1899-12-31 06:47:47	1899-12-31 22:19:08
1988	Joseph Donatucci	M	2	35	1899-12-31 02:28:50	1899-12-31 05:10:31	1899-12-31 07:44:51	1899-12-31 09:35:20	1899-12-31 21:55:57
1988	E Mccorral-Smyth	M	2	48	1899-12-31 02:47:29	1899-12-31 05:06:24	1899-12-31 07:45:22	1899-12-31 06:30:39	1899-12-31 22:09:54
1988	Kiyoshi Kawasaki	M	2	35	1899-12-31 03:02:32	1899-12-31 05:45:42	1899-12-31 07:46:28	1899-12-31 09:52:46	1900-01-01 00:25:31
1983	Bill Bell	M	2	61	1899-12-31 02:31:50	1899-12-31 05:33:10	1899-12-31 07:47:15	1899-12-31 07:41:45	1899-12-31 23:34:00
1988	Willy Mccarty	M	2	41	1899-12-31 02:47:01	1899-12-31 05:42:19	1899-12-31 07:47:47	1899-12-31 09:02:44	1899-12-31 23:04:56
1988	Satoru Takahashi	M	2	26	1899-12-31 03:37:57	1899-12-31 05:05:56	1899-12-31 07:50:18	1899-12-31 07:11:13	1899-12-31 23:45:24
1988	Michael Moore	M	2	40	1899-12-31 03:41:02	1899-12-31 05:22:05	1899-12-31 07:51:09	1899-12-31 06:58:41	1899-12-31 23:52:57
1988	Cowman A-Moo-Ha	M	2	44	1899-12-31 02:19:57	1899-12-31 05:12:38	1899-12-31 07:52:41	1899-12-31 08:15:10	1899-12-31 23:40:26
1988	Toshiyuki Teranis	M	2	26	1899-12-31 02:33:02	1899-12-31 05:19:12	1899-12-31 07:53:06	1899-12-31 08:48:07	1900-01-01 00:33:27
1988	Kenneth Solakian	M	2	37	1899-12-31 02:53:17	1899-12-31 05:30:41	1899-12-31 07:53:12	1899-12-31 10:20:08	1900-01-01 01:03:18
1983	Jim Mensching	M	2	37	1899-12-31 03:16:15	1899-12-31 05:33:29	1899-12-31 07:54:06	1899-12-31 07:43:31	1900-01-01 00:27:21
1988	Yoshimi Tsugawa	M	2	36	1899-12-31 02:40:51	1899-12-31 05:14:13	1899-12-31 07:54:52	1899-12-31 07:07:20	1899-12-31 22:24:03
1989	Gary Shields	M	2	34	1899-12-31 02:46:30	1899-12-31 05:37:29	1899-12-31 07:55:08	1899-12-31 10:38:51	1899-12-31 22:39:14
1988	Kihoshi Yamashita	M	2	39	1899-12-31 02:41:54	1899-12-31 04:51:09	1899-12-31 07:55:13	1899-12-31 06:42:48	1899-12-31 22:11:04
1988	Mori Momasu	M	2	59	1899-12-31 02:43:19	1899-12-31 05:23:52	1899-12-31 07:55:46	1899-12-31 09:16:00	1899-12-31 23:07:04
1989	Hannes Blaschke	M	2	29	1899-12-31 02:49:12	1899-12-31 06:01:03	1899-12-31 07:55:59	1899-12-31 08:02:50	1900-01-01 00:49:04
1989	Wes Kessenich	M	2	27	1899-12-31 02:42:10	1899-12-31 05:39:34	1899-12-31 07:57:58	1899-12-31 09:30:47	1900-01-01 00:07:11
1985	Manuel Dacosta	M	2	32	1899-12-31 03:11:58	1899-12-31 06:08:35	1899-12-31 07:58:41	1899-12-31 06:57:55	1900-01-01 00:17:09
1989	Guenter Escher	M	2	30	1899-12-31 03:01:34	1899-12-31 05:54:47	1899-12-31 07:59:57	1899-12-31 06:44:58	1899-12-31 23:41:16
1989	James Freim	M	2	43	1899-12-31 02:59:15	1899-12-31 04:48:32	1899-12-31 08:00:56	1899-12-31 07:26:13	1899-12-31 23:14:56
1983	Joe Mensching	M	2	39	1899-12-31 03:02:09	1899-12-31 05:43:04	1899-12-31 08:01:03	1899-12-31 06:41:58	1899-12-31 23:28:14
1989	Steve Hare	M	2	32	1899-12-31 02:44:20	1899-12-31 04:26:48	1899-12-31 08:01:19	1899-12-31 06:51:49	1899-12-31 22:19:16
1989	Premananda Childs	M	2	44	1899-12-31 02:38:48	1899-12-31 05:14:00	1899-12-31 08:01:58	1899-12-31 10:50:26	1899-12-31 23:19:03
1989	Don Newman	M	2	30	1899-12-31 02:25:49	1899-12-31 05:37:52	1899-12-31 08:02:01	1899-12-31 10:09:20	1900-01-01 02:15:02
1989	Marc Wenz	M	2	21	1899-12-31 02:50:47	1899-12-31 06:03:11	1899-12-31 08:02:19	1899-12-31 07:52:44	1900-01-01 00:49:01
1989	Ronald De Pontes	M	2	36	1899-12-31 03:20:38	1899-12-31 05:32:20	1899-12-31 08:03:00	1899-12-31 10:11:54	1900-01-01 03:07:52
1983	Joseph Donatucci	M	2	30	1899-12-31 03:14:15	1899-12-31 05:37:02	1899-12-31 08:03:10	1899-12-31 07:33:25	1900-01-01 00:27:52
1989	Jack Nosco	M	2	27	1899-12-31 03:17:48	1899-12-31 05:47:58	1899-12-31 08:03:15	1899-12-31 06:24:10	1899-12-31 23:33:11
1989	Ulrich Strunz	M	2	46	1899-12-31 03:00:00	1899-12-31 05:14:51	1899-12-31 08:04:17	1899-12-31 09:22:47	1900-01-01 01:41:55
1989	Kosuke Kataoka	M	2	31	1899-12-31 02:32:28	1899-12-31 05:25:49	1899-12-31 08:04:41	1899-12-31 06:22:50	1899-12-31 22:25:48
1989	James Budde	M	2	44	1899-12-31 03:39:07	1899-12-31 05:46:03	1899-12-31 08:04:42	1899-12-31 07:01:06	1900-01-01 00:30:58
1989	Todd Leigh	M	2	47	1899-12-31 03:10:42	1899-12-31 06:15:03	1899-12-31 08:05:27	1899-12-31 08:25:17	1900-01-01 01:56:29
1985	Todd Leigh	M	2	43	1899-12-31 03:23:49	1899-12-31 05:47:30	1899-12-31 08:05:35	1899-12-31 08:05:40	1900-01-01 01:22:34
1989	John Wilson	M	2	40	1899-12-31 03:15:18	1899-12-31 05:20:54	1899-12-31 08:05:39	1899-12-31 07:22:57	1900-01-01 01:50:14
1986	George Goldstine	M	2	37	1899-12-31 02:51:55	1899-12-31 05:17:56	1899-12-31 08:05:57	1899-12-31 08:29:05	1900-01-01 00:44:53
1986	Tsuyoshi Okubo	M	2	27	1899-12-31 02:39:31	1899-12-31 05:56:06	1899-12-31 08:05:58	1899-12-31 07:02:55	1899-12-31 23:44:30
1989	Bruce Wilson	M	2	44	1899-12-31 03:04:29	1899-12-31 05:18:34	1899-12-31 08:06:16	1899-12-31 08:29:52	1900-01-01 01:40:23
1989	Manuel Dacosta	M	2	36	1899-12-31 04:24:58	1899-12-31 05:49:17	1899-12-31 08:06:22	1899-12-31 07:13:48	1900-01-01 01:34:25
1989	Satoshi Ando	M	2	36	1899-12-31 03:24:06	1899-12-31 05:31:52	1899-12-31 08:07:05	1899-12-31 08:29:52	1900-01-01 00:30:47
1983	J Harrison	M	2	39	1899-12-31 03:06:43	1899-12-31 05:43:04	1899-12-31 08:08:01	1899-12-31 06:46:41	1899-12-31 23:44:29
1989	Jngo Busse	M	2	28	1899-12-31 02:44:31	1899-12-31 06:00:55	1899-12-31 08:08:18	1899-12-31 10:01:57	1899-12-31 23:52:46
1989	Georg Von Schrader	M	2	52	1899-12-31 04:21:04	1899-12-31 05:50:47	1899-12-31 08:08:28	1899-12-31 08:15:11	1900-01-01 02:35:30
1989	Kenji Ikeda	M	2	28	1899-12-31 03:31:31	1899-12-31 05:36:05	1899-12-31 08:09:27	1899-12-31 08:12:06	1900-01-01 01:29:09
1989	Stefan Schlett	M	2	27	1899-12-31 04:01:18	1899-12-31 05:21:05	1899-12-31 08:09:32	1899-12-31 08:59:33	1900-01-01 02:41:52
1989	Roger Taylor	M	2	44	1899-12-31 02:29:27	1899-12-31 04:48:12	1899-12-31 08:09:48	1899-12-31 08:03:23	1899-12-31 23:30:00
1989	Marcus Wiesen	M	2	24	1899-12-31 03:01:42	1899-12-31 05:38:09	1899-12-31 08:10:12	1899-12-31 11:24:18	1900-01-01 01:13:33
1989	Akira Komatsubara	M	2	40	1899-12-31 02:46:45	1899-12-31 05:22:31	1899-12-31 08:10:38	1899-12-31 07:30:14	1899-12-31 23:50:08
1989	William Heusted	M	2	41	1899-12-31 03:02:27	1899-12-31 05:50:41	1899-12-31 08:10:48	1899-12-31 09:45:22	1900-01-01 01:53:41
1989	Yutaka Sasaki	M	2	33	1899-12-31 04:08:10	1899-12-31 05:28:17	1899-12-31 08:10:49	1899-12-31 06:41:46	1900-01-01 00:29:02
1989	Joseph Donatucci	M	2	36	1899-12-31 03:21:39	1899-12-31 05:29:00	1899-12-31 08:10:58	1899-12-31 09:18:44	1900-01-01 02:20:21
1989	Toshihiko Adachi	M	2	33	1899-12-31 02:54:38	1899-12-31 05:12:06	1899-12-31 08:12:10	1899-12-31 05:33:57	1899-12-31 21:52:51
1989	Jan Nyboer	M	2	46	1899-12-31 02:32:58	1899-12-31 05:47:33	1899-12-31 08:13:07	1899-12-31 07:54:38	1900-01-01 00:28:16
1985	Sixto Linares	M	2	30	1899-12-31 02:59:08	1899-12-31 06:07:08	1899-12-31 08:14:38	1899-12-31 08:12:05	1900-01-01 01:32:59
1989	Yoshihiro Chijimatsu	M	2	24	1899-12-31 04:04:47	1899-12-31 05:03:46	1899-12-31 08:14:59	1899-12-31 07:51:52	1900-01-01 01:15:24
1989	Cowman A-Moo-Ha	M	2	45	1899-12-31 02:47:15	1899-12-31 05:11:21	1899-12-31 08:15:19	1899-12-31 08:03:51	1900-01-01 00:17:46
1989	Mark Mozilo	M	2	26	1899-12-31 05:40:38	1899-12-31 05:30:29	1899-12-31 08:15:52	1899-12-31 08:17:32	1900-01-01 03:44:31
1985	Willy Mccarty	M	2	38	1899-12-31 03:09:39	1899-12-31 06:25:08	1899-12-31 08:16:31	1899-12-31 06:27:30	1900-01-01 00:18:48
1983	Cowman A-Moo-Ha	M	2	39	1899-12-31 03:54:51	1899-12-31 05:55:05	1899-12-31 08:17:10	1899-12-31 08:17:33	1900-01-01 02:24:39
1989	Wally Aniban	M	2	47	1899-12-31 02:43:45	1899-12-31 06:08:34	1899-12-31 08:17:50	1899-12-31 10:31:10	1900-01-01 01:36:57
1989	Takeshi Momoki	M	2	22	1899-12-31 02:37:42	1899-12-31 05:44:00	1899-12-31 08:18:15	1899-12-31 06:38:58	1899-12-31 23:18:55
1989	Clare St.Arnaud	M	2	51	1899-12-31 03:10:36	1899-12-31 05:39:58	1899-12-31 08:18:52	1899-12-31 07:07:20	1900-01-01 00:16:46
1989	Paul McKENNA	M	2	31	1899-12-31 03:01:48	1899-12-31 05:22:42	1899-12-31 08:19:24	1899-12-31 11:03:01	1900-01-01 00:29:51
1989	Kazuhiro Kawamura	M	2	22	1899-12-31 03:49:57	1899-12-31 06:24:55	1899-12-31 08:19:45	1899-12-31 09:57:00	1900-01-01 04:31:37
1989	Rokuzo Kamiya	M	2	26	1899-12-31 02:49:00	1899-12-31 05:28:55	1899-12-31 08:19:58	1899-12-31 07:12:41	1899-12-31 23:50:34
1986	Don Newman	M	2	27	1899-12-31 03:12:34	1899-12-31 05:56:44	1899-12-31 08:20:56	1899-12-31 10:14:28	1900-01-01 03:44:42
1989	Noble Beck	M	2	39	1899-12-31 03:03:39	1899-12-31 05:34:55	1899-12-31 08:21:08	1899-12-31 09:58:49	1900-01-01 01:24:28
1989	John Dooley	M	2	52	1899-12-31 04:00:00	1899-12-31 05:06:43	1899-12-31 08:21:40	1899-12-31 08:39:28	1900-01-01 02:07:51
1989	Gene-Turtle Powe	M	2	39	1899-12-31 03:07:53	1899-12-31 04:56:27	1899-12-31 08:21:51	1899-12-31 10:47:52	1899-12-31 23:05:04
1990	Gary Shields	M	2	35	1899-12-31 02:40:16	1899-12-31 05:52:16	1899-12-31 08:22:18	1899-12-31 10:41:41	1900-01-01 00:43:57
1985	William Woodruff	M	2	36	1899-12-31 03:02:34	1899-12-31 05:39:22	1899-12-31 08:22:26	1899-12-31 07:57:34	1900-01-01 01:01:56
1984	James Budde	M	2	39	1899-12-31 02:26:03	1899-12-31 05:50:04	1899-12-31 08:23:18	1899-12-31 06:49:23	1899-12-31 23:28:48
1990	Jack Nosco	M	2	28	1899-12-31 03:03:13	1899-12-31 05:49:04	1899-12-31 08:23:38	1899-12-31 07:01:06	1900-01-01 00:32:28
1990	Wes Kessenich	M	2	28	1899-12-31 02:56:30	1899-12-31 05:29:20	1899-12-31 08:23:58	1899-12-31 08:21:52	1900-01-01 01:11:40
1983	S Tanoai	M	2	41	1899-12-31 03:15:23	1899-12-31 06:07:30	1899-12-31 08:25:13	1899-12-31 08:09:25	1900-01-01 01:57:31
1990	Woody Woodruff	M	2	41	1899-12-31 02:51:09	1899-12-31 05:42:57	1899-12-31 08:25:25	1899-12-31 08:13:32	1900-01-01 01:13:03
1990	John Wilson	M	2	41	1899-12-31 03:06:04	1899-12-31 05:51:59	1899-12-31 08:25:43	1899-12-31 06:30:59	1900-01-01 02:19:56
1990	Cyrus Malek-Madani	M	2	33	1899-12-31 03:37:44	1899-12-31 05:41:22	1899-12-31 08:26:04	1899-12-31 08:51:18	1900-01-01 02:36:28
1990	Don Newman	M	2	31	1899-12-31 03:20:00	1899-12-31 05:06:11	1899-12-31 08:26:13	1899-12-31 07:49:37	1900-01-01 00:42:01
1990	Greg Crompton	M	2	36	1899-12-31 02:53:15	1899-12-31 06:10:43	1899-12-31 08:26:25	1899-12-31 07:28:46	1900-01-01 00:59:09
1985	Eddie Miller	M	2	39	1899-12-31 02:37:46	1899-12-31 06:02:24	1899-12-31 08:26:45	1899-12-31 07:23:55	1900-01-01 00:30:50
1990	Franz Fruehauf	M	2	31	1899-12-31 04:27:47	1899-12-31 05:24:44	1899-12-31 08:27:01	1899-12-31 07:53:24	1900-01-01 02:12:56
1990	Hubert Schwartz	M	2	35	1899-12-31 02:20:42	1899-12-31 06:00:42	1899-12-31 08:27:14	1899-12-31 07:49:00	1900-01-01 00:37:38
1990	Robin Murray	M	2	38	1899-12-31 02:20:48	1899-12-31 05:56:21	1899-12-31 08:28:09	1899-12-31 10:10:37	1900-01-01 00:40:28
1990	Rene Bacchi	M	2	45	1899-12-31 03:29:22	1899-12-31 05:24:25	1899-12-31 08:28:24	1899-12-31 08:18:13	1900-01-01 01:40:24
1990	Ulrich Strunz	M	2	47	1899-12-31 02:48:00	1899-12-31 05:51:14	1899-12-31 08:29:00	1899-12-31 08:33:38	1900-01-01 01:41:52
1990	Edy Riegler	M	2	48	1899-12-31 03:40:29	1899-12-31 06:30:57	1899-12-31 08:30:37	1899-12-31 10:06:24	1900-01-01 03:04:16
1990	Ean Jackson	M	2	33	1899-12-31 02:54:58	1899-12-31 05:25:33	1899-12-31 08:31:04	1899-12-31 07:50:27	1900-01-01 00:42:02
1983	Eddie Miller	M	2	37	1899-12-31 02:50:03	1899-12-31 06:12:03	1899-12-31 08:31:15	1899-12-31 07:32:29	1900-01-01 01:05:50
1990	Rene Nuesch	M	2	31	1899-12-31 02:48:14	1899-12-31 05:32:10	1899-12-31 08:31:33	1899-12-31 11:18:16	1900-01-01 01:20:17
1990	Manuel Dacosta	M	2	37	1899-12-31 03:05:35	1899-12-31 05:43:54	1899-12-31 08:31:43	1899-12-31 08:08:22	1900-01-01 01:29:34
1990	Mike Lanham	M	2	36	1899-12-31 03:14:49	1899-12-31 05:57:01	1899-12-31 08:32:03	1899-12-31 06:16:46	1900-01-01 00:00:39
1990	Soichi Konishi	M	2	30	1899-12-31 04:22:29	1899-12-31 06:17:28	1899-12-31 08:32:06	1899-12-31 07:03:08	1900-01-01 02:15:11
1990	James Budde	M	2	45	1899-12-31 03:34:12	1899-12-31 05:21:21	1899-12-31 08:32:53	1899-12-31 08:32:09	1900-01-01 03:03:21
1990	Peter Strychowski	M	2	41	1899-12-31 03:22:25	1899-12-31 05:22:44	1899-12-31 08:33:05	1899-12-31 08:23:35	1900-01-01 00:41:23
1990	Mickey Campaniello	M	2	37	1899-12-31 03:39:58	1899-12-31 06:14:04	1899-12-31 08:33:19	1899-12-31 08:29:52	1900-01-01 02:57:13
1986	Steve Hare	M	2	29	1899-12-31 03:31:49	1899-12-31 06:05:11	1899-12-31 08:33:55	1899-12-31 07:33:19	1900-01-01 01:44:14
1985	Michael Moore	M	2	37	1899-12-31 02:53:02	1899-12-31 05:55:13	1899-12-31 08:34:41	1899-12-31 10:01:58	1900-01-01 03:24:54
1990	Brett Torino	M	2	32	1899-12-31 03:44:12	1899-12-31 06:35:18	1899-12-31 08:34:43	1899-12-31 08:23:35	1900-01-01 03:17:48
1984	Keith Arakaki	M	2	33	1899-12-31 03:29:18	1899-12-31 06:10:19	1899-12-31 08:35:18	1899-12-31 07:49:02	1900-01-01 02:03:57
1990	Yoshihiro Chijimatsu	M	2	25	1899-12-31 03:11:07	1899-12-31 06:05:22	1899-12-31 08:36:05	1899-12-31 07:50:52	1900-01-01 01:43:26
1990	Kevin Heath	M	2	31	1899-12-31 03:29:27	1899-12-31 05:34:53	1899-12-31 08:36:29	1899-12-31 07:55:35	1900-01-01 00:27:17
1984	Conrad Will	M	2	43	1899-12-31 03:58:55	1899-12-31 06:03:47	1899-12-31 08:37:19	1899-12-31 09:18:08	1900-01-01 03:58:09
1990	Paul Mckenna	M	2	32	1899-12-31 03:46:46	1899-12-31 06:03:58	1899-12-31 08:37:22	1899-12-31 11:38:38	1900-01-01 06:06:44
1990	Frank Kenny	M	2	35	1899-12-31 03:14:33	1899-12-31 05:55:46	1899-12-31 08:37:32	1899-12-31 10:24:14	1900-01-01 02:05:05
1990	Shigetomo Fukumoto	M	2	40	1899-12-31 04:15:22	1899-12-31 05:21:28	1899-12-31 08:38:57	1899-12-31 07:33:32	1900-01-01 01:49:19
1990	Masato Ebihara	M	2	38	1899-12-31 02:51:29	1899-12-31 06:08:40	1899-12-31 08:39:40	1899-12-31 09:49:22	1900-01-01 01:48:46
1986	Akira Kuramochi	M	2	32	1899-12-31 03:02:21	1899-12-31 05:45:42	1899-12-31 08:39:57	1899-12-31 07:34:04	1900-01-01 01:02:04
1990	Shigeo Tsubata	M	2	37	1899-12-31 03:30:53	1899-12-31 05:58:39	1899-12-31 08:40:06	1899-12-31 09:49:03	1900-01-01 02:51:21
1990	Terry Ives	M	2	54	1899-12-31 04:22:23	1899-12-31 06:02:03	1899-12-31 08:40:19	1899-12-31 07:40:23	1900-01-01 02:45:08
1990	Frank Ferren	M	2	51	1899-12-31 02:24:46	1899-12-31 06:04:13	1899-12-31 08:40:28	1899-12-31 07:42:19	1900-01-01 00:51:46
1986	Radar Fixott	M	2	36	1899-12-31 02:59:06	1899-12-31 05:57:36	1899-12-31 08:40:54	1899-12-31 08:30:52	1900-01-01 02:08:28
1992	Ulli Winkelmann	M	2	35	1899-12-31 02:20:33	1899-12-31 05:52:21	1899-12-31 08:41:06	1899-12-31 05:57:36	1899-12-31 22:51:36
1992	Andi Kiefer	M	2	28	1899-12-31 02:21:56	1899-12-31 05:35:22	1899-12-31 08:41:33	1899-12-31 10:20:58	1900-01-01 00:30:31
1992	Don Newman	M	2	33	1899-12-31 04:59:30	1899-12-31 05:20:30	1899-12-31 08:41:35	1899-12-31 08:17:11	1900-01-01 03:18:46
1992	Konrad Braun	M	2	41	1899-12-31 04:54:16	1899-12-31 06:28:04	1899-12-31 08:41:44	1899-12-31 07:22:57	1900-01-01 03:27:01
1992	Volker Roth	M	2	42	1899-12-31 03:29:50	1899-12-31 05:36:31	1899-12-31 08:42:07	1899-12-31 06:34:18	1900-01-01 00:22:46
1992	Detlef Brauer	M	2	48	1899-12-31 03:33:25	1899-12-31 05:29:38	1899-12-31 08:42:41	1899-12-31 07:08:18	1900-01-01 00:54:02
1993	George Goldstine	M	2	44	1899-12-31 03:13:54	1899-12-31 06:11:55	1899-12-31 08:42:42	1899-12-31 09:19:45	1900-01-01 02:43:44
1992	Klaus Haetzel	M	2	51	1899-12-31 02:34:34	1899-12-31 03:11:35	1899-12-31 08:42:43	1899-12-31 07:12:10	1899-12-31 21:41:02
1993	Hans-Juergen Schle	M	2	37	1899-12-31 03:02:54	1899-12-31 05:48:54	1899-12-31 08:42:45	1899-12-31 07:26:28	1900-01-01 01:01:01
1993	Kiyoshi Kawasaki	M	2	40	1899-12-31 03:44:19	1899-12-31 05:52:44	1899-12-31 08:44:33	1899-12-31 09:19:01	1900-01-01 03:33:49
1993	Yoshihiro Chijimatsu	M	2	28	1899-12-31 02:44:35	1899-12-31 05:25:00	1899-12-31 08:44:34	1899-12-31 06:29:13	1899-12-31 23:23:00
1993	Zuheir Khoudeir	M	2	52	1899-12-31 03:14:28	1899-12-31 06:20:41	1899-12-31 08:44:47	1899-12-31 08:42:12	1900-01-01 03:02:08
1993	Ulli Winkelmann	M	2	36	1899-12-31 03:35:17	1899-12-31 05:45:13	1899-12-31 08:45:02	1899-12-31 07:47:31	1900-01-01 01:53:03
1993	Hisazumi Kishimoto	M	2	31	1899-12-31 03:21:55	1899-12-31 06:13:45	1899-12-31 08:45:59	1899-12-31 08:43:07	1900-01-01 03:04:46
1993	Kenichi Harada	M	2	26	1899-12-31 04:22:55	1899-12-31 05:57:47	1899-12-31 08:46:12	1899-12-31 09:36:27	1900-01-01 04:37:00
1993	Shoichiro Takimoto	M	2	31	1899-12-31 02:41:24	1899-12-31 06:08:18	1899-12-31 08:46:16	1899-12-31 07:38:47	1900-01-01 01:14:45
1993	Rolf Kajanne	M	2	40	1899-12-31 02:52:17	1899-12-31 06:05:09	1899-12-31 08:46:52	1899-12-31 10:50:09	1900-01-01 02:21:05
1994	Sergio Cordeiro	M	2	40	1899-12-31 03:19:55	1899-12-31 05:56:32	1899-12-31 08:47:14	1899-12-31 08:18:07	1900-01-01 02:21:48
1994	Masaaki Okabe	M	2	43	1899-12-31 02:42:39	1899-12-31 06:12:09	1899-12-31 08:47:28	1899-12-31 11:16:11	1900-01-01 01:35:23
1993	Masaaki Machiya	M	2	46	1899-12-31 04:02:49	1899-12-31 05:53:26	1899-12-31 08:47:36	1899-12-31 09:26:03	1900-01-01 04:09:00
1994	Daniel Schallmo	M	2	37	1899-12-31 03:54:42	1899-12-31 05:54:22	1899-12-31 08:47:44	1899-12-31 07:43:10	1900-01-01 02:19:58
1986	Manuel Dacosta	M	2	33	1899-12-31 03:57:13	1899-12-31 06:22:12	1899-12-31 08:47:57	1899-12-31 07:30:00	1900-01-01 02:37:22
1994	Yoshihiro Chijimatsu	M	2	29	1899-12-31 03:36:10	1899-12-31 06:21:31	1899-12-31 08:49:02	1899-12-31 09:31:12	1900-01-01 05:10:57
1994	Marcus Wiesen	M	2	29	1899-12-31 03:44:40	1899-12-31 06:08:34	1899-12-31 08:49:17	1899-12-31 07:39:29	1900-01-01 02:22:00
1994	Bill Coons	M	2	40	1899-12-31 03:08:48	1899-12-31 05:41:10	1899-12-31 08:49:48	1899-12-31 08:50:56	1900-01-01 02:30:42
1994	Bill Hawke	M	2	38	1899-12-31 05:11:15	1899-12-31 05:52:57	1899-12-31 08:49:54	1899-12-31 08:24:33	1900-01-01 04:18:00
1994	Hiroyuki Tagami	M	2	34	1899-12-31 03:55:20	1899-12-31 03:29:41	1899-12-31 08:50:19	1899-12-31 07:51:32	1900-01-01 00:06:52
1994	Masahiro Koda	M	2	34	1899-12-31 03:21:30	1899-12-31 06:19:56	1899-12-31 08:50:35	1899-12-31 08:41:09	1900-01-01 03:13:10
1985	Bill Bell	M	2	63	1899-12-31 03:45:46	1899-12-31 06:06:16	1899-12-31 08:50:40	1899-12-31 10:21:07	1900-01-01 05:03:49
1994	Noble Beck	M	2	44	1899-12-31 03:43:27	1899-12-31 05:25:07	1899-12-31 08:50:52	1899-12-31 08:16:42	1900-01-01 02:16:08
1995	Kevin Cutjar	M	2	29	1899-12-31 03:16:23	1899-12-31 05:41:57	1899-12-31 08:51:22	1899-12-31 11:14:03	1900-01-01 03:07:37
1995	Daniel Schallmo	M	2	38	1899-12-31 03:18:20	1899-12-31 05:43:57	1899-12-31 08:51:24	1899-12-31 06:38:29	1900-01-01 00:32:10
1994	Brian Keeling	M	2	41	1899-12-31 03:02:25	1899-12-31 05:40:48	1899-12-31 08:51:44	1899-12-31 08:09:54	1900-01-01 01:44:51
1994	Satoshi Tsujii	M	2	40	1899-12-31 02:49:37	1899-12-31 05:03:13	1899-12-31 08:51:47	1899-12-31 08:49:20	1900-01-01 01:33:57
1994	Takashi Osawa	M	2	35	1899-12-31 02:51:31	1899-12-31 05:22:24	1899-12-31 08:51:51	1899-12-31 08:04:27	1900-01-01 01:10:13
1995	Sergio Cordeiro	M	2	41	1899-12-31 03:37:05	1899-12-31 06:21:46	1899-12-31 08:52:34	1899-12-31 06:20:07	1900-01-01 03:19:27
1995	John Nickles	M	2	31	1899-12-31 03:28:51	1899-12-31 06:09:16	1899-12-31 08:53:26	1899-12-31 10:32:30	1900-01-01 05:04:03
1995	Ole Petersen	M	2	34	1899-12-31 03:12:52	1899-12-31 06:01:34	1899-12-31 08:54:00	1899-12-31 09:14:20	1900-01-01 03:22:46
1995	Bernd Michel	M	2	32	1899-12-31 03:26:28	1899-12-31 05:22:44	1899-12-31 08:54:45	1899-12-31 08:29:52	1900-01-01 03:50:21
1995	Victor Pereira	M	2	28	1899-12-31 04:04:36	1899-12-31 06:26:53	1899-12-31 08:54:54	1899-12-31 10:50:13	1900-01-01 06:16:36
1995	Randy Kliewer	M	2	41	1899-12-31 02:41:28	1899-12-31 05:56:37	1899-12-31 08:55:05	1899-12-31 09:21:30	1900-01-01 02:33:42
1995	Yoshihiro Chijimatsu	M	2	30	1899-12-31 03:28:09	1899-12-31 06:25:30	1899-12-31 08:55:29	1899-12-31 09:19:01	1900-01-01 04:08:09
1995	Peter Bourne	M	2	44	1899-12-31 03:43:14	1899-12-31 05:23:49	1899-12-31 08:55:41	1899-12-31 08:56:12	1900-01-01 02:58:56
1995	Ulli Winkelmann	M	2	38	1899-12-31 03:47:19	1899-12-31 05:51:42	1899-12-31 08:55:50	1899-12-31 07:22:57	1900-01-01 04:14:23
1995	Muneo Iwasaki	M	2	31	1899-12-31 03:38:56	1899-12-31 06:38:38	1899-12-31 08:56:25	1899-12-31 09:41:46	1900-01-01 04:55:45
1995	Junichi Takashio	M	2	37	1899-12-31 06:02:32	1899-12-31 06:02:48	1899-12-31 08:56:31	1899-12-31 12:51:00	1900-01-01 09:53:37
1995	Robert Egbert	M	2	25	1899-12-31 03:18:44	1899-12-31 05:58:23	1899-12-31 08:56:43	1899-12-31 11:32:25	1900-01-01 02:13:04
1995	Hitohiko Sakajiro	M	2	48	1899-12-31 04:00:55	1899-12-31 06:24:09	1899-12-31 08:57:14	1899-12-31 07:31:38	1900-01-01 02:53:56
1995	Marcus Wiesen	M	2	30	1899-12-31 03:12:18	1899-12-31 05:58:58	1899-12-31 08:57:20	1899-12-31 09:04:40	1900-01-01 03:13:00
1995	Kenjiro Kato	M	2	26	1899-12-31 04:27:52	1899-12-31 06:15:38	1899-12-31 08:57:20	1899-12-31 08:00:30	1900-01-01 03:41:20
1995	Franz Fiby	M	2	40	1899-12-31 03:33:19	1899-12-31 05:47:21	1899-12-31 08:57:22	1899-12-31 07:41:56	1900-01-01 01:59:58
1995	Tomihiko Takara	M	2	37	1899-12-31 03:53:01	1899-12-31 06:33:30	1899-12-31 08:59:02	1899-12-31 06:49:22	1900-01-01 02:14:00
1995	Jerzy Gorski	M	2	40	1899-12-31 03:02:44	1899-12-31 06:05:30	1899-12-31 08:59:36	1899-12-31 10:26:50	1900-01-01 02:25:03
1996	John Nickles	M	2	32	1899-12-31 03:33:25	1899-12-31 05:31:59	1899-12-31 09:00:19	1899-12-31 06:46:58	1900-01-01 00:52:41
1996	Patric Vignal	M	2	34	1899-12-31 04:36:39	1899-12-31 06:01:50	1899-12-31 09:00:41	1899-12-31 09:04:54	1900-01-01 04:44:04
1996	Kevin Murphy	M	2	28	1899-12-31 03:04:40	1899-12-31 06:26:17	1899-12-31 09:00:45	1899-12-31 09:46:55	1900-01-01 04:18:37
1986	William Garrels	M	2	26	1899-12-31 03:46:03	1899-12-31 06:29:38	1899-12-31 09:01:59	1899-12-31 08:53:45	1900-01-01 04:11:25
1996	Gabriel Sternberg	M	2	26	1899-12-31 02:31:45	1899-12-31 05:46:36	1899-12-31 09:02:13	1899-12-31 07:04:00	1900-01-01 00:24:34
1996	Ulli Winkelmann	M	2	39	1899-12-31 04:28:47	1899-12-31 05:58:41	1899-12-31 09:02:36	1899-12-31 11:05:46	1900-01-01 05:08:17
1996	Vito Bialla	M	2	48	1899-12-31 03:29:00	1899-12-31 05:51:56	1899-12-31 09:03:13	1899-12-31 07:47:32	1900-01-01 02:11:41
1996	Junichi Takashio	M	2	38	1899-12-31 03:00:13	1899-12-31 06:14:41	1899-12-31 09:04:14	1899-12-31 11:22:14	1900-01-01 02:04:54
1996	Richard Diamond	M	2	32	1899-12-31 03:27:31	1899-12-31 05:44:59	1899-12-31 09:04:58	1899-12-31 10:50:07	1900-01-01 00:45:26
1996	Cory Foulk	M	2	37	1899-12-31 03:32:51	1899-12-31 06:00:39	1899-12-31 09:05:10	1899-12-31 08:21:10	1900-01-01 02:59:00
1996	Yoshihiro Chijimatsu	M	2	31	1899-12-31 03:29:43	1899-12-31 06:29:06	1899-12-31 09:05:45	1899-12-31 09:14:57	1900-01-01 04:19:31
1997	Oliver Kiel	M	2	30	1899-12-31 03:26:03	1899-12-31 06:21:03	1899-12-31 09:06:03	1899-12-31 08:30:54	1900-01-01 03:24:03
1997	Erik Seedhouse	M	2	33	1899-12-31 04:08:33	1899-12-31 06:10:42	1899-12-31 09:06:11	1899-12-31 08:55:24	1900-01-01 04:20:50
1997	Peter Kotland	M	2	25	1899-12-31 03:01:10	1899-12-31 06:10:18	1899-12-31 09:06:14	1899-12-31 08:17:32	1900-01-01 02:51:02
1984	Scott Molina	M	2	24	1899-12-31 03:25:19	1899-12-31 06:28:14	1899-12-31 09:06:15	1899-12-31 08:42:15	1900-01-01 03:42:03
1997	John Nickles	M	2	33	1899-12-31 03:07:15	1899-12-31 06:20:01	1899-12-31 09:06:28	1899-12-31 09:16:48	1900-01-01 03:50:32
1997	Sergio Cordeiro	M	2	43	1899-12-31 03:44:48	1899-12-31 06:27:24	1899-12-31 09:07:26	1899-12-31 11:03:37	1900-01-01 02:31:45
1997	Robert Egbert	M	2	27	1899-12-31 02:57:06	1899-12-31 06:31:34	1899-12-31 09:07:35	1899-12-31 06:15:32	1900-01-01 05:22:04
1997	Michael Schiff	M	2	43	1899-12-31 05:15:40	1899-12-31 06:33:45	1899-12-31 09:07:58	1899-12-31 10:13:25	1900-01-01 07:10:48
1997	Don Newman	M	2	38	1899-12-31 03:11:24	1899-12-31 05:34:34	1899-12-31 09:08:39	1899-12-31 09:26:59	1900-01-01 03:57:01
1997	Ralf Steenmann	M	2	30	1899-12-31 03:33:34	1899-12-31 03:36:13	1899-12-31 09:08:41	1899-12-31 08:04:26	1900-01-01 00:12:54
1997	Yoshihiro Chijimatsu	M	2	32	1899-12-31 04:19:37	1899-12-31 06:11:03	1899-12-31 09:09:02	1899-12-31 10:21:26	1900-01-01 06:01:08
1997	Vito Bialla	M	2	49	1899-12-31 03:10:53	1899-12-31 05:58:18	1899-12-31 09:09:13	1899-12-31 07:16:33	1900-01-01 02:43:24
1997	Steve Simpson	M	2	33	1899-12-31 03:05:20	1899-12-31 06:14:48	1899-12-31 09:09:17	1899-12-31 08:48:01	1900-01-01 03:17:26
1984	Cowman A-Moo-Ha	M	2	40	1899-12-31 02:53:17	1899-12-31 06:17:03	1899-12-31 09:09:22	1899-12-31 08:11:03	1900-01-01 02:30:45
1997	CJ Ong	M	2	40	1899-12-31 04:35:37	1899-12-31 07:06:24	1899-12-31 09:09:32	1899-12-31 07:13:27	1900-01-01 04:05:00
1998	Holger Spiegel	M	2	26	1899-12-31 02:59:20	1899-12-31 05:50:30	1899-12-31 09:10:34	1899-12-31 08:43:12	1900-01-01 02:42:41
1997	Cory Foulk	M	2	38	1899-12-31 03:35:07	1899-12-31 05:43:52	1899-12-31 09:10:56	1899-12-31 10:18:50	1900-01-01 04:48:45
1998	Erik Seedhouse	M	2	34	1899-12-31 03:52:46	1899-12-31 06:22:48	1899-12-31 09:10:58	1899-12-31 11:59:58	1900-01-01 07:26:30
1998	Markus Wiedemann	M	2	24	1899-12-31 02:20:15	1899-12-31 05:58:54	1899-12-31 09:11:16	1899-12-31 08:23:35	1900-01-01 02:49:23
1998	Sergio Cordeiro	M	2	44	1899-12-31 03:28:19	1899-12-31 05:38:55	1899-12-31 09:11:30	1899-12-31 07:31:54	1900-01-01 01:50:38
1998	Richard Clark	M	2	60	1899-12-31 04:05:07	1899-12-31 05:48:09	1899-12-31 09:12:03	1899-12-31 09:39:32	1900-01-01 03:54:58
1998	Cliff Rigsbee	M	2	45	1899-12-31 03:04:52	1899-12-31 03:33:07	1899-12-31 09:12:09	1899-12-31 08:56:14	1900-01-01 00:46:22
1998	Jean Pierre	M	2		1899-12-31 03:57:16	1899-12-31 06:37:27	1899-12-31 09:12:23	1899-12-31 06:46:58	1900-01-01 05:29:31
1998	Rick Kent	M	2	41	1899-12-31 04:01:06	1899-12-31 06:26:15	1899-12-31 09:12:55	1899-12-31 09:57:45	1900-01-01 05:38:01
1998	Ulli Winkelmann	M	2	41	1899-12-31 02:51:00	1899-12-31 05:04:40	1899-12-31 09:12:58	1899-12-31 08:54:55	1900-01-01 02:03:33
1998	Gil Loomis	M	2	48	1899-12-31 03:20:01	1899-12-31 06:06:41	1899-12-31 09:13:12	1899-12-31 09:33:16	1900-01-01 04:13:30
1998	Yoshihiro Chijimatsu	M	2	33	1899-12-31 04:42:27	1899-12-31 06:23:49	1899-12-31 09:13:25	1899-12-31 08:46:27	1900-01-01 05:06:08
1998	Vito Bialla	M	2	50	1899-12-31 03:51:50	1899-12-31 05:16:56	1899-12-31 09:13:31	1899-12-31 07:54:23	1900-01-01 02:16:40
1998	Hector Torres	M	2	29	1899-12-31 03:28:59	1899-12-31 05:32:14	1899-12-31 09:13:39	1899-12-31 08:02:50	1900-01-01 02:47:01
1998	Michael Schiff	M	2	44	1899-12-31 04:47:43	1899-12-31 06:30:03	1899-12-31 09:13:45	1899-12-31 09:26:59	1900-01-01 05:58:30
1998	Manoel Mendes	M	2	38	1899-12-31 04:25:14	1899-12-31 06:58:50	1899-12-31 09:13:52	1899-12-31 08:57:34	1900-01-01 05:35:30
1998	Gerry Van De Wint	M	2	61	1899-12-31 03:03:37	1899-12-31 05:45:35	1899-12-31 09:14:20	1899-12-31 11:22:13	1900-01-01 15:25:45
1998	CJ Ong	M	2	41	1899-12-31 04:33:07	1899-12-31 05:51:01	1899-12-31 09:14:24	1899-12-31 07:58:48	1900-01-01 03:37:20
1986	William Woodruff	M	2	37	1899-12-31 03:09:07	1899-12-31 06:36:43	1899-12-31 09:14:49	1899-12-31 08:55:49	1900-01-01 03:56:28
1998	Guenter Rauer	M	2		1899-12-31 03:00:15	1899-12-31 04:56:59	1899-12-31 09:16:08	1899-12-31 08:31:54	1900-01-01 01:45:16
1998	Cory Foulk	M	2	39	1899-12-31 03:34:40	1899-12-31 05:37:16	1899-12-31 09:16:26	1899-12-31 09:43:10	1900-01-01 04:11:32
1998	Junichi Takashio	M	2	40	1899-12-31 04:20:20	1899-12-31 06:08:43	1899-12-31 09:17:25	1899-12-31 08:20:44	1900-01-01 04:07:12
1998	Michael Hargrove	M	2	50	1899-12-31 02:53:15	1899-12-31 05:45:22	1899-12-31 09:17:37	1899-12-31 07:49:37	1900-01-01 01:45:51
1986	Peter Bourne	M	2	35	1899-12-31 03:04:08	1899-12-31 06:15:35	1899-12-31 09:17:50	1899-12-31 08:40:03	1900-01-01 03:17:36
1998	Jim Howley	M	2	37	1899-12-31 02:39:32	1899-12-31 05:56:46	1899-12-31 09:18:10	1899-12-31 09:15:50	1900-01-01 03:10:18
1998	Martin Brauns	M	2	38	1899-12-31 03:07:36	1899-12-31 03:36:16	1899-12-31 09:18:34	1899-12-31 11:31:48	1900-01-01 06:34:14
1998	Kevin Howard	M	2		1899-12-31 03:26:17	1899-12-31 06:03:10	1899-12-31 09:19:49	1899-12-31 07:32:12	1900-01-01 02:21:28
1999	Anatoly Levsha	M	2	41	1899-12-31 04:58:58	1899-12-31 06:07:05	1899-12-31 09:20:42	1899-12-31 08:18:17	1900-01-01 05:58:54
1999	Ferg Hawke	M	2	42	1899-12-31 04:46:44	1899-12-31 06:27:28	1899-12-31 09:20:46	1899-12-31 09:57:01	1900-01-01 06:31:59
1999	John Nickles	M	2	35	1899-12-31 03:21:12	1899-12-31 05:56:36	1899-12-31 09:20:53	1899-12-31 08:35:17	1900-01-01 03:13:58
1999	Harry Kuehnelt	M	2	34	1899-12-31 03:18:22	1899-12-31 05:42:04	1899-12-31 09:21:16	1899-12-31 09:45:18	1900-01-01 04:07:00
1999	Jochen Dembeck	M	2	32	1899-12-31 04:23:46	1899-12-31 06:29:40	1899-12-31 09:21:22	1899-12-31 06:14:16	1900-01-01 05:50:36
1999	Cliff Rigsbee	M	2	46	1899-12-31 04:22:21	1899-12-31 05:59:07	1899-12-31 09:21:24	1899-12-31 11:43:02	1900-01-01 07:25:54
1999	Ralf Steenmann	M	2	32	1899-12-31 03:40:03	1899-12-31 06:42:11	1899-12-31 09:21:46	1899-12-31 08:17:02	1900-01-01 04:01:02
1999	Thomas Rodgers	M	2	39	1899-12-31 02:54:49	1899-12-31 06:38:44	1899-12-31 09:21:56	1899-12-31 09:16:22	1900-01-01 04:12:01
1999	Don Newman	M	2	40	1899-12-31 03:58:15	1899-12-31 05:29:38	1899-12-31 09:22:01	1899-12-31 08:19:25	1900-01-01 03:09:19
1999	Paul Hopwood	M	2	36	1899-12-31 04:32:48	1899-12-31 06:22:41	1899-12-31 09:22:25	1899-12-31 09:07:28	1900-01-01 05:25:22
1985	Paul Vanderveld	M	2	33	1899-12-31 04:44:17	1899-12-31 06:55:58	1899-12-31 09:22:32	1899-12-31 10:17:34	1900-01-01 07:20:21
1985	Stephen Aglinskas	M	2	42	1899-12-31 03:31:15	1899-12-31 06:43:06	1899-12-31 09:22:40	1899-12-31 10:54:49	1900-01-01 06:31:50
1999	Gil Loomis	M	2	49	1899-12-31 04:14:38	1899-12-31 07:32:20	1899-12-31 09:23:18	1899-12-31 09:57:31	1900-01-01 07:07:47
1999	Hector Torres	M	2	30	1899-12-31 03:55:05	1899-12-31 06:00:53	1899-12-31 09:23:39	1899-12-31 08:32:37	1900-01-01 03:18:32
1999	John Nixon	M	2	42	1899-12-31 02:38:42	1899-12-31 05:56:30	1899-12-31 09:24:14	1899-12-31 07:46:26	1900-01-01 01:45:52
1999	Rick Kent	M	2	42	1899-12-31 04:23:51	1899-12-31 06:28:26	1899-12-31 09:24:30	1899-12-31 10:48:48	1900-01-01 07:05:35
1985	Michael Kasser	M	2	44	1899-12-31 03:42:01	1899-12-31 06:58:03	1899-12-31 09:24:32	1899-12-31 08:07:04	1900-01-01 04:11:40
1999	Vito Bialla	M	2	51	1899-12-31 03:44:38	1899-12-31 06:36:55	1899-12-31 09:24:39	1899-12-31 08:44:58	1900-01-01 04:31:10
1984	Manuel Dacosta	M	2	31	1899-12-31 03:31:33	1899-12-31 06:43:22	1899-12-31 09:25:20	1899-12-31 10:27:26	1900-01-01 06:07:41
1999	Fernando Alves	M	2	36	1899-12-31 03:32:43	1899-12-31 06:06:43	1899-12-31 09:25:26	1899-12-31 08:34:18	1900-01-01 03:39:10
1983	Keith Arakaki	M	2	32	1899-12-31 03:06:24	1899-12-31 06:52:16	1899-12-31 09:26:09	1899-12-31 08:45:07	1900-01-01 04:09:56
1999	Domingo Sanz	M	2	43	1899-12-31 03:00:15	1899-12-31 06:46:22	1899-12-31 09:26:15	1899-12-31 09:22:10	1900-01-01 04:35:02
1999	Pedro Morganti	M	2	36	1899-12-31 05:27:13	1899-12-31 07:08:28	1899-12-31 09:26:23	1899-12-31 08:38:21	1900-01-01 06:40:25
1999	Yoshihiro Chijimatsu	M	2	34	1899-12-31 03:16:12	1899-12-31 06:19:13	1899-12-31 09:26:42	1899-12-31 08:17:32	1900-01-01 04:49:53
1999	Christoph Ludwig	M	2	32	1899-12-31 04:02:05	1899-12-31 05:25:29	1899-12-31 09:27:34	1899-12-31 08:05:59	1900-01-01 02:20:23
1999	Philip Nickles	M	2	34	1899-12-31 04:25:14	1899-12-31 05:50:55	1899-12-31 09:27:59	1899-12-31 07:58:32	1900-01-01 03:42:40
1985	Stephen Anderson	M	2	23	1899-12-31 03:21:09	1899-12-31 07:02:45	1899-12-31 09:28:30	1899-12-31 06:49:31	1900-01-01 02:41:55
1999	Junichi Takashio	M	2	41	1899-12-31 02:25:02	1899-12-31 05:52:12	1899-12-31 09:28:32	1899-12-31 08:18:17	1900-01-01 03:01:11
1985	Andy Andres	M	2	25	1899-12-31 02:57:20	1899-12-31 06:19:59	1899-12-31 09:28:33	1899-12-31 06:54:57	1900-01-01 01:40:49
1999	Cory Foulk	M	2	40	1899-12-31 03:41:06	1899-12-31 06:51:51	1899-12-31 09:28:44	1899-12-31 07:50:49	1900-01-01 05:21:15
2000	Uros Velepec	M	2	33	1899-12-31 04:21:58	1899-12-31 06:53:05	1899-12-31 09:28:53	1899-12-31 08:41:56	1900-01-01 05:25:52
2000	Peter Mueller	M	2	38	1899-12-31 03:17:42	1899-12-31 06:48:15	1899-12-31 09:29:03	1899-12-31 10:57:56	1900-01-01 06:32:56
2000	Brett Sublett	M	2	35	1899-12-31 02:52:38	1899-12-31 03:33:44	1899-12-31 09:29:44	1899-12-31 07:45:09	1899-12-31 23:39:27
2000	Thomas Rodgers	M	2	40	1899-12-31 05:11:23	1899-12-31 06:05:14	1899-12-31 09:30:28	1899-12-31 09:39:08	1900-01-01 06:26:13
2000	Markus Wiedemann	M	2	26	1899-12-31 03:04:45	1899-12-31 05:55:53	1899-12-31 09:30:33	1899-12-31 11:24:41	1900-01-01 01:56:59
2000	Robert Egbert	M	2	30	1899-12-31 04:22:12	1899-12-31 06:41:22	1899-12-31 09:30:38	1899-12-31 10:57:37	1900-01-01 07:31:49
2000	John Reidy	M	2	33	1899-12-31 05:05:05	1899-12-31 06:29:50	1899-12-31 09:30:52	1899-12-31 10:41:12	1900-01-01 07:46:59
2000	Jack Nosco	M	2	38	1899-12-31 05:09:13	1899-12-31 06:31:44	1899-12-31 09:31:29	1899-12-31 08:34:55	1900-01-01 08:36:44
1985	Marvin Jones	M	2	32	1899-12-31 03:57:51	1899-12-31 06:30:17	1899-12-31 09:31:43	1899-12-31 10:17:47	1900-01-01 06:17:38
2000	Ole Bujk	M	2	31	1899-12-31 03:56:40	1899-12-31 07:06:07	1899-12-31 09:33:49	1899-12-31 09:31:43	1900-01-01 06:08:19
2000	Alex Laws	M	2	35	1899-12-31 03:49:20	1899-12-31 06:10:43	1899-12-31 09:33:52	1899-12-31 09:26:59	1900-01-01 07:15:52
1983	Chip Salaun	M	2	36	1899-12-31 03:05:58	1899-12-31 06:32:04	1899-12-31 09:34:02	1899-12-31 09:02:16	1900-01-01 04:14:20
2000	David Secord	M	2	48	1899-12-31 04:12:47	1899-12-31 06:05:56	1899-12-31 09:34:29	1899-12-31 10:54:35	1900-01-01 06:47:47
2000	Michael Saviano	M	2	24	1899-12-31 03:23:55	1899-12-31 06:32:05	1899-12-31 09:34:58	1899-12-31 09:13:00	1900-01-01 04:43:58
2001	Uros Velepec	M	2	34	1899-12-31 04:29:12	1899-12-31 06:31:02	1899-12-31 09:35:09	1899-12-31 12:57:02	1900-01-01 09:32:25
2001	Sergio Cordeiro	M	2	47	1899-12-31 03:12:45	1899-12-31 06:26:19	1899-12-31 09:36:07	1899-12-31 06:47:49	1900-01-01 04:07:37
2001	Chris Bettis	M	2	33	1899-12-31 04:20:00	1899-12-31 06:00:50	1899-12-31 09:36:22	1899-12-31 08:30:14	1900-01-01 04:27:26
2001	Peter Mueller	M	2	39	1899-12-31 03:44:45	1899-12-31 05:57:35	1899-12-31 09:36:30	1899-12-31 10:10:24	1900-01-01 05:29:14
2001	Ulli Winkelmann	M	2	44	1899-12-31 03:39:28	1899-12-31 06:22:20	1899-12-31 09:36:36	1899-12-31 09:38:09	1900-01-01 05:16:33
1985	Cowman A-Moo-Ha	M	2	41	1899-12-31 03:21:46	1899-12-31 06:40:14	1899-12-31 09:36:38	1899-12-31 08:07:56	1900-01-01 03:46:34
2001	Gary Wang	M	2	34	1899-12-31 04:14:02	1899-12-31 06:19:29	1899-12-31 09:36:49	1899-12-31 09:07:54	1900-01-01 05:18:14
2001	Miro Kregar	M	2	39	1899-12-31 04:28:22	1899-12-31 05:55:55	1899-12-31 09:36:51	1899-12-31 07:24:26	1900-01-01 03:25:34
2001	Bruce Smith	M	2	33	1899-12-31 04:07:45	1899-12-31 05:58:47	1899-12-31 09:36:58	1899-12-31 10:38:48	1900-01-01 06:22:16
2001	Steve Wilson	M	2	31	1899-12-31 03:50:16	1899-12-31 06:51:30	1899-12-31 09:37:29	1899-12-31 09:17:40	1900-01-01 05:36:55
2001	Manoel Mendes	M	2	41	1899-12-31 02:58:40	1899-12-31 06:17:21	1899-12-31 09:38:00	1899-12-31 08:13:50	1900-01-01 04:52:50
2001	Steven Bartis	M	2	37	1899-12-31 04:12:59	1899-12-31 06:25:34	1899-12-31 09:38:15	1899-12-31 07:38:21	1900-01-01 03:55:09
2001	Henning Jacobsen	M	2	46	1899-12-31 03:38:55	1899-12-31 06:20:22	1899-12-31 09:39:00	1899-12-31 09:21:07	1900-01-01 04:59:24
2001	Hector Torres	M	2	32	1899-12-31 03:15:19	1899-12-31 07:24:21	1899-12-31 09:39:13	1899-12-31 09:06:29	1900-01-01 05:25:22
2001	Yoshihiro Chijimatsu	M	2	36	1899-12-31 03:37:01	1899-12-31 06:27:25	1899-12-31 09:40:37	1899-12-31 09:26:16	1900-01-01 05:11:19
2001	Cory Foulk	M	2	42	1899-12-31 05:01:35	1899-12-31 06:05:21	1899-12-31 09:41:08	1899-12-31 11:52:22	1900-01-01 06:37:26
2001	David McCluskey	M	2	47	1899-12-31 02:44:54	1899-12-31 06:10:11	1899-12-31 09:41:52	1899-12-31 09:32:09	1900-01-01 05:15:48
2001	David Wilson	M	2	55	1899-12-31 02:31:37	1899-12-31 06:50:53	1899-12-31 09:41:59	1899-12-31 07:33:20	1900-01-01 06:02:51
1984	Joseph Donatucci	M	2	31	1899-12-31 03:10:20	1899-12-31 06:51:17	1899-12-31 09:42:21	1899-12-31 08:45:30	1900-01-01 04:29:28
2002	Tony O'Keeffe	M	2	41	1899-12-31 04:35:35	1899-12-31 07:06:33	1899-12-31 09:42:29	1899-12-31 09:24:39	1900-01-01 06:49:16
2002	Gordo Byrn	M	2	33	1899-12-31 03:31:56	1899-12-31 05:53:59	1899-12-31 09:42:42	1899-12-31 07:38:46	1900-01-01 02:47:23
1986	Hiromatsu Suyama	M	2	26	1899-12-31 02:47:36	1899-12-31 07:02:41	1899-12-31 09:42:57	1899-12-31 08:28:02	1900-01-01 04:01:16
1986	Kazuhiro Terasaki	M	2	22	1899-12-31 03:24:14	1899-12-31 06:56:00	1899-12-31 09:42:57	1899-12-31 09:07:28	1900-01-01 05:10:39
2002	Manoel Mendes	M	2	42	1899-12-31 02:42:23	1899-12-31 06:52:01	1899-12-31 09:43:12	1899-12-31 09:34:15	1900-01-01 04:51:51
1983	Stephen Aglinskas	M	2	40	1899-12-31 03:29:33	1899-12-31 06:50:05	1899-12-31 09:43:14	1899-12-31 09:19:16	1900-01-01 05:22:08
2002	Gary Wang	M	2	35	1899-12-31 03:15:39	1899-12-31 06:16:47	1899-12-31 09:43:17	1899-12-31 11:06:34	1900-01-01 06:22:17
2002	Markus Wittwer	M	2	38	1899-12-31 05:38:19	1899-12-31 06:21:39	1899-12-31 09:43:20	1899-12-31 09:48:38	1900-01-01 07:31:56
2002	Donald Fink	M	2	44	1899-12-31 03:37:18	1899-12-31 04:42:19	1899-12-31 09:43:26	1899-12-31 08:23:38	1900-01-01 00:26:41
2002	Sergio Cordeiro	M	2	48	1899-12-31 03:04:32	1899-12-31 06:04:43	1899-12-31 09:43:32	1899-12-31 10:25:27	1900-01-01 05:19:37
2002	Alex Laws	M	2	37	1899-12-31 03:45:23	1899-12-31 07:10:56	1899-12-31 09:43:57	1899-12-31 09:29:54	1900-01-01 06:10:10
2002	Andreas Buescher	M	2	41	1899-12-31 03:40:27	1899-12-31 06:45:04	1899-12-31 09:44:36	1899-12-31 09:40:29	1900-01-01 04:31:07
2002	Andrew Stanfield	M	2	40	1899-12-31 02:39:27	1899-12-31 06:39:28	1899-12-31 09:44:54	1899-12-31 08:53:38	1900-01-01 03:57:27
2002	Yoshihiro Chijimatsu	M	2	37	1899-12-31 04:02:05	1899-12-31 06:29:29	1899-12-31 09:46:12	1899-12-31 10:46:30	1900-01-01 07:04:16
2002	Ian Svendsen	M	2	42	1899-12-31 02:35:06	1899-12-31 07:32:35	1899-12-31 09:46:25	1899-12-31 09:27:14	1900-01-01 05:21:20
2003	Thomas Rodgers	M	2	43	1899-12-31 04:45:37	1899-12-31 06:46:48	1899-12-31 09:47:15	1899-12-31 09:31:12	1900-01-01 08:21:00
2003	Tony O'Keeffe	M	2	42	1899-12-31 04:16:01	1899-12-31 05:58:34	1899-12-31 09:47:17	1899-12-31 08:50:07	1900-01-01 04:51:59
2003	Martin Raymond	M	2	41	1899-12-31 04:54:22	1899-12-31 07:04:47	1899-12-31 09:47:50	1899-12-31 10:00:32	1900-01-01 07:47:31
2003	Gary Wang	M	2	36	1899-12-31 03:45:58	1899-12-31 07:01:01	1899-12-31 09:47:59	1899-12-31 09:16:47	1900-01-01 07:33:27
2003	Jamie Patrick	M	2	33	1899-12-31 03:23:56	1899-12-31 07:09:17	1899-12-31 09:48:31	1899-12-31 10:05:25	1900-01-01 06:27:09
2003	Yoshihiro Chijimatsu	M	2	38	1899-12-31 03:19:01	1899-12-31 06:17:05	1899-12-31 09:50:19	1899-12-31 08:58:26	1900-01-01 04:24:51
2003	Cory Foulk	M	2	44	1899-12-31 03:01:39	1899-12-31 03:37:21	1899-12-31 09:50:35	1899-12-31 07:01:54	1899-12-31 23:31:29
2004	Jonas Colting	M	2	31	1899-12-31 03:38:16	1899-12-31 06:30:47	1899-12-31 09:51:01	1899-12-31 12:35:43	1900-01-01 08:35:47
2003	Rob Kasper	M	2	44	1899-12-31 04:04:13	1899-12-31 06:16:42	1899-12-31 09:51:20	1899-12-31 09:59:14	1900-01-01 06:33:13
2004	Seth Bitting	M	2	32	1899-12-31 03:45:38	1899-12-31 07:00:04	1899-12-31 09:52:06	1899-12-31 09:31:21	1900-01-01 06:09:09
2004	Lon Freeman	M	2	29	1899-12-31 02:56:34	1899-12-31 06:18:47	1899-12-31 09:52:27	1899-12-31 09:57:01	1900-01-01 04:13:11
2004	Gary Wang	M	2	37	1899-12-31 03:57:29	1899-12-31 07:24:39	1899-12-31 09:52:55	1899-12-31 11:18:25	1900-01-01 07:14:37
1986	Roy Fagan	M	2	35	1899-12-31 03:19:32	1899-12-31 07:05:32	1899-12-31 09:52:57	1899-12-31 11:59:59	1900-01-01 08:18:00
2004	Alex Laws	M	2	39	1899-12-31 02:56:41	1899-12-31 06:54:49	1899-12-31 09:53:01	1899-12-31 09:21:15	1900-01-01 05:05:46
2004	Martin Raymond	M	2	42	1899-12-31 04:59:01	1899-12-31 06:16:42	1899-12-31 09:53:39	1899-12-31 09:22:44	1900-01-01 06:32:06
2004	Ulli Winkelmann	M	2	47	1899-12-31 04:17:11	1899-12-31 06:39:14	1899-12-31 09:53:40	1899-12-31 09:31:12	1900-01-01 07:53:06
2004	Ryan McKenzie	M	2	36	1899-12-31 03:53:04	1899-12-31 06:13:22	1899-12-31 09:54:30	1899-12-31 07:58:06	1900-01-01 03:59:02
1985	Benjamin Fisher	M	2	28	1899-12-31 03:31:55	1899-12-31 06:56:41	1899-12-31 09:54:34	1899-12-31 08:31:17	1900-01-01 04:54:27
2004	Roland Patzina	M	2	38	1899-12-31 04:11:39	1899-12-31 06:37:16	1899-12-31 09:55:03	1899-12-31 10:30:06	1900-01-01 07:14:04
2004	Gil Loomis	M	2	54	1899-12-31 03:39:04	1899-12-31 06:29:58	1899-12-31 09:55:33	1899-12-31 08:18:17	1900-01-01 05:47:32
2004	Cory Foulk	M	2	45	1899-12-31 03:30:51	1899-12-31 06:30:55	1899-12-31 09:55:39	1899-12-31 11:40:48	1900-01-01 05:50:11
2004	Giorgio Alessi	M	2	39	1899-12-31 04:19:51	1899-12-31 07:08:29	1899-12-31 09:55:42	1899-12-31 08:58:30	1900-01-01 06:22:32
2004	Mark Lindsey	M	2	48	1899-12-31 03:07:29	1899-12-31 06:38:54	1899-12-31 09:55:47	1899-12-31 10:45:58	1900-01-01 06:28:08
2004	Stuart Trager	M	2	42	1899-12-31 04:48:18	1899-12-31 05:47:46	1899-12-31 09:55:52	1899-12-31 07:38:18	1900-01-01 04:10:14
2005	Gary Wang	M	2	38	1899-12-31 04:34:23	1899-12-31 06:57:41	1899-12-31 09:57:32	1899-12-31 09:41:43	1900-01-01 07:01:19
1985	Joseph Donatucci	M	2	32	1899-12-31 03:59:20	1899-12-31 07:02:27	1899-12-31 09:57:33	1899-12-31 08:09:40	1900-01-01 05:09:00
2004	Yoshihiro Chijimatsu	M	2	39	1899-12-31 04:59:08	1899-12-31 06:25:14	1899-12-31 09:57:33	1899-12-31 07:16:31	1900-01-01 07:23:52
2005	Michael Hanreck	M	2	30	1899-12-31 03:32:27	1899-12-31 06:51:04	1899-12-31 09:57:42	1899-12-31 09:26:59	1900-01-01 08:02:01
2005	Alexandre Ribeiro	M	2	40	1899-12-31 05:00:56	1899-12-31 06:45:41	1899-12-31 09:57:51	1899-12-31 06:27:58	1900-01-01 08:26:09
2005	Dan Bodden	M	2	38	1899-12-31 03:51:20	1899-12-31 06:29:21	1899-12-31 09:58:14	1899-12-31 09:00:30	1900-01-01 05:19:25
2005	Martin Raymond	M	2	43	1899-12-31 03:49:09	1899-12-31 07:04:49	1899-12-31 09:58:26	1899-12-31 08:21:00	1900-01-01 07:55:18
2005	Giorgio Alessi	M	2	40	1899-12-31 03:41:49	1899-12-31 07:13:57	1899-12-31 09:58:37	1899-12-31 08:13:38	1900-01-01 05:08:01
2005	Philip Nickles	M	2	40	1899-12-31 04:37:32	1899-12-31 06:54:26	1899-12-31 09:59:05	1899-12-31 09:31:12	1900-01-01 07:02:15
2005	Mike Rouse	M	2	53	1899-12-31 04:52:50	1899-12-31 06:52:44	1899-12-31 09:59:49	1899-12-31 09:34:55	1900-01-01 09:01:34
2005	Yoshihiro Chijimatsu	M	2	40	1899-12-31 03:47:22	1899-12-31 07:01:38	1899-12-31 09:59:57	1899-12-31 08:08:57	1900-01-01 06:32:31
2005	Cory Foulk	M	2	46	1899-12-31 03:06:51	1899-12-31 07:15:21	1899-12-31 10:00:46	1899-12-31 09:50:34	1900-01-01 06:13:32
2005	Ian Mayhew	M	2	36	1899-12-31 03:42:46	1899-12-31 05:49:27	1899-12-31 10:01:24	1899-12-31 08:36:21	1900-01-01 03:22:11
2005	Peter Thompson	M	2	46	1899-12-31 03:30:05	1899-12-31 08:14:40	1899-12-31 10:01:42	1899-12-31 10:45:49	1900-01-01 09:02:20
1985	Frank Ferren	M	2	46	1899-12-31 03:59:56	1899-12-31 07:12:36	1899-12-31 10:01:43	1899-12-31 07:52:38	1900-01-01 05:06:53
1984	Wally Aniban	M	2	42	1899-12-31 03:52:59	1899-12-31 07:30:56	1899-12-31 10:02:22	1899-12-31 10:51:18	1900-01-01 08:17:35
2005	Mark Lindsey	M	2	49	1899-12-31 02:55:45	1899-12-31 06:32:49	1899-12-31 10:02:23	1899-12-31 08:23:35	1900-01-01 04:03:34
2006	David Goggins	M	2	31	1899-12-31 02:38:05	1899-12-31 06:36:04	1899-12-31 10:03:11	1899-12-31 07:41:19	1900-01-01 02:58:39
2006	Martin Raymond	M	2	44	1899-12-31 04:37:33	1899-12-31 06:52:20	1899-12-31 10:03:19	1899-12-31 08:25:00	1900-01-01 08:48:22
2006	Juan Craveri	M	2	38	1899-12-31 04:15:56	1899-12-31 07:17:53	1899-12-31 10:03:19	1899-12-31 11:53:31	1900-01-01 09:30:39
2006	Dan Brown	M	2	30	1899-12-31 04:03:55	1899-12-31 07:43:09	1899-12-31 10:03:30	1899-12-31 09:03:14	1900-01-01 06:53:48
2006	Ariel Martinez	M	2	34	1899-12-31 03:35:06	1899-12-31 06:45:04	1899-12-31 10:03:33	1899-12-31 09:57:02	1900-01-01 06:21:15
2006	Fred Coogan	M	2	43	1899-12-31 04:27:15	1899-12-31 07:07:31	1899-12-31 10:03:41	1899-12-31 08:30:35	1900-01-01 06:18:02
1985	Kevin Petitte	M	2	33	1899-12-31 04:07:14	1899-12-31 07:09:04	1899-12-31 10:03:43	1899-12-31 09:52:50	1900-01-01 07:12:51
2006	Jeff Landauer	M	2	39	1899-12-31 02:33:38	1899-12-31 06:36:07	1899-12-31 10:03:52	1899-12-31 08:17:32	1900-01-01 04:50:04
2005	Bertrand Dor	M	2	54	2:37:24	4:57:20	1899-12-31 10:03:58	7:48:24	1900-01-01 01:27:06
2006	Gary Wang	M	2	39	1899-12-31 03:33:36	1899-12-31 06:37:06	1899-12-31 10:03:59	1899-12-31 07:45:46	1900-01-01 06:47:17
2006	Roger Lehman	M	2	45	1899-12-31 04:18:29	1899-12-31 06:08:15	1899-12-31 10:04:05	1899-12-31 08:59:48	1900-01-01 05:46:49
2006	Kenjiro Kato	M	2	37	1899-12-31 03:44:18	1899-12-31 06:59:26	1899-12-31 10:04:11	1899-12-31 10:48:56	1900-01-01 07:36:51
2006	Shane Eversfield	M	2	49	1899-12-31 04:16:47	1899-12-31 06:20:35	1899-12-31 10:04:44	1899-12-31 07:57:51	1900-01-01 04:39:57
2006	David Benwell	M	2	47	1899-12-31 04:36:39	1899-12-31 06:28:53	1899-12-31 10:04:44	1899-12-31 09:50:52	1900-01-01 07:01:08
2006	Cory Foulk	M	2	47	1899-12-31 02:38:23	1899-12-31 06:20:24	1899-12-31 10:04:47	1899-12-31 11:19:49	1900-01-01 03:52:10
2006	Roland Patzina	M	2	40	1899-12-31 04:32:31	1899-12-31 06:27:00	1899-12-31 10:04:58	1899-12-31 06:51:43	1900-01-01 03:56:12
2006	Daryl Allen	M	2	56	1899-12-31 04:43:15	1899-12-31 07:08:28	1899-12-31 10:05:00	1899-12-31 08:24:46	1900-01-01 07:21:41
2006	Mike Rouse	M	2	54	1899-12-31 03:29:54	1899-12-31 06:42:57	1899-12-31 10:05:04	1899-12-31 10:14:32	1900-01-01 07:40:09
2006	Jon Powell	M	2	49	1899-12-31 04:33:33	1899-12-31 07:47:12	1899-12-31 10:05:05	1899-12-31 08:46:44	1900-01-01 07:12:34
2006	Ed Chang	M	2	33	1899-12-31 04:14:20	1899-12-31 07:29:36	1899-12-31 10:06:11	1899-12-31 10:08:58	1900-01-01 07:59:05
2006	Sean McFadden	M	2	26	1899-12-31 02:40:36	1899-12-31 06:21:21	1899-12-31 10:07:26	1899-12-31 09:18:07	1900-01-01 04:27:30
2006	Bertrand Dor	M	2	55	1899-12-31 03:08:45	1899-12-31 06:12:29	1899-12-31 10:07:29	1899-12-31 08:17:45	1900-01-01 03:46:28
2007	Tim Sheeper	M	2	44	1899-12-31 03:58:04	1899-12-31 06:59:28	1899-12-31 10:08:11	1899-12-31 06:38:36	1900-01-01 06:25:28
2007	Jonas Colting	M	2	34	3:42:54	5:13:44	1899-12-31 10:08:37	7:31:17	1900-01-01 02:36:32
2007	Alexandre Ribeiro	M	2	42	3:34:03	6:57:54	1899-12-31 10:08:44	1899-12-31 11:57:17	1900-01-01 08:37:58
2007	Scott Gower	M	2	43	1899-12-31 04:02:59	1899-12-31 07:24:48	1899-12-31 10:09:05	1899-12-31 10:51:51	1900-01-01 08:28:43
2007	Miro Kregar	M	2	45	1899-12-31 03:34:00	1899-12-31 06:32:26	1899-12-31 10:09:12	1899-12-31 07:14:38	1900-01-01 05:37:08
2007	Peter Mueller	M	2	45	3:52:05	5:05:04	1899-12-31 10:09:24	8:51:34	1900-01-01 03:58:07
2007	Josef Ajram	M	2	29	1899-12-31 02:59:15	1899-12-31 03:36:37	1899-12-31 10:10:23	1899-12-31 10:20:18	1900-01-01 02:48:33
2007	Jeff Landauer	M	2	40	1899-12-31 03:34:56	1899-12-31 07:02:36	1899-12-31 10:10:29	1899-12-31 06:13:46	1900-01-01 08:06:17
1985	Premananda Childs	M	2	40	1899-12-31 03:46:15	1899-12-31 07:22:07	1899-12-31 10:10:31	1899-12-31 08:25:26	1900-01-01 05:44:19
2007	Gary Wang	M	2	40	1899-12-31 04:58:16	1899-12-31 06:47:47	1899-12-31 10:10:43	1899-12-31 10:41:11	1900-01-01 08:38:37
2007	Kari Martens	M	2	50	1899-12-31 03:46:53	1899-12-31 08:00:42	1899-12-31 10:10:47	1899-12-31 11:40:23	1900-01-01 09:38:45
2007	Martin Raymond	M	2	45	1899-12-31 03:21:20	1899-12-31 06:30:51	1899-12-31 10:11:29	1899-12-31 07:51:40	1900-01-01 05:39:43
1985	Brett Torino	M	2	27	1899-12-31 04:16:09	1899-12-31 07:13:32	1899-12-31 10:11:29	1899-12-31 10:15:37	1900-01-01 07:56:47
2007	Roland Patzina	M	2	41	1899-12-31 04:01:56	1899-12-31 06:53:38	1899-12-31 10:12:36	1899-12-31 09:39:35	1900-01-01 06:47:45
2007	Jay German	M	2	46	1899-12-31 05:27:02	1899-12-31 06:18:39	1899-12-31 10:14:28	1899-12-31 07:24:17	1900-01-01 08:01:43
2007	Giorgio Alessi	M	2	41	1899-12-31 03:12:54	1899-12-31 06:19:41	1899-12-31 10:14:34	1899-12-31 07:59:34	1900-01-01 03:46:43
2007	Stephen Johnson	M	2	45	1899-12-31 04:20:53	1899-12-31 06:33:05	1899-12-31 10:15:05	1899-12-31 09:17:10	1900-01-01 06:26:13
2007	Rob Van Geen	M	2	46	1899-12-31 02:46:03	1899-12-31 07:31:48	1899-12-31 10:15:08	1899-12-31 08:46:27	1900-01-01 06:54:20
1983	A Shapiro	M	2	31	1899-12-31 04:22:31	1899-12-31 06:54:47	1899-12-31 10:15:09	1899-12-31 07:48:32	1900-01-01 05:20:59
2007	Cory Foulk	M	2	48	1899-12-31 04:36:22	1899-12-31 06:13:11	1899-12-31 10:15:15	1899-12-31 09:34:54	1900-01-01 06:39:42
2007	Bill Bradley	M	2	47	1899-12-31 03:43:21	1899-12-31 06:27:45	1899-12-31 10:15:38	1899-12-31 08:30:57	1900-01-01 04:57:41
2007	Vito Bialla	M	2	59	1899-12-31 02:50:43	1899-12-31 06:10:40	1899-12-31 10:15:49	1899-12-31 08:50:16	1900-01-01 04:07:28
1986	Premananda Childs	M	2	41	1899-12-31 03:37:47	1899-12-31 07:01:25	1899-12-31 10:15:53	1899-12-31 09:07:49	1900-01-01 06:02:54
1986	Naofumi Kuroda	M	2	29	1899-12-31 03:44:58	1899-12-31 07:00:46	1899-12-31 10:15:53	1899-12-31 10:11:38	1900-01-01 07:13:15
2007	Mike Rouse	M	2	55	1899-12-31 03:25:11	1899-12-31 06:19:16	1899-12-31 10:16:31	1899-12-31 07:22:57	1900-01-01 04:13:29
2008	Miro Kregar	M	2	46	1899-12-31 03:44:12	1899-12-31 06:41:07	1899-12-31 10:17:00	1899-12-31 11:43:54	1900-01-01 06:17:39
2008	Alexandre Ribeiro	M	2	43	1899-12-31 03:11:54	1899-12-31 06:24:14	1899-12-31 10:17:01	1899-12-31 12:00:03	1900-01-01 07:53:12
2008	Peter Kotland	M	2	36	1899-12-31 04:34:27	1899-12-31 06:57:35	1899-12-31 10:17:07	1899-12-31 10:25:27	1900-01-01 08:14:36
2007	Riccardo Alessi	M	2	37	4:07:46	5:38:38	1899-12-31 10:17:39	8:28:56	1900-01-01 04:32:59
2008	Tony O'Keeffe	M	2	47	1899-12-31 04:36:00	1899-12-31 06:33:27	1899-12-31 10:17:43	1899-12-31 11:23:34	1900-01-01 08:41:13
2008	Carlos Conceicao	M	2	44	1899-12-31 03:58:30	1899-12-31 06:33:00	1899-12-31 10:18:10	1899-12-31 09:13:00	1900-01-01 06:02:40
1984	Paul Vandervelde	M	2	32	1899-12-31 03:47:34	1899-12-31 06:58:56	1899-12-31 10:18:22	1899-12-31 08:45:00	1900-01-01 05:49:52
2008	Erik Seedhouse	M	2	44	1899-12-31 03:37:21	1899-12-31 06:54:42	1899-12-31 10:18:28	1899-12-31 06:34:07	1900-01-01 05:50:04
2008	Scott Gower	M	2	44	1899-12-31 03:37:56	1899-12-31 06:22:07	1899-12-31 10:19:04	1899-12-31 08:13:50	1900-01-01 08:11:29
2008	Peter Mueller	M	2	46	1899-12-31 04:55:21	1899-12-31 07:14:55	1899-12-31 10:19:07	1899-12-31 09:14:37	1900-01-01 07:44:00
1984	Chip Salaun	M	2	37	1899-12-31 03:31:39	1899-12-31 07:03:18	1899-12-31 10:19:16	1899-12-31 08:54:27	1900-01-01 05:48:40
2008	Richard Roll	M	2	42	1899-12-31 03:41:11	1899-12-31 07:23:55	1899-12-31 10:19:23	1899-12-31 11:00:29	1900-01-01 08:24:58
2008	Josef Ajram	M	2	30	1899-12-31 03:25:29	1899-12-31 06:18:36	1899-12-31 10:19:58	1899-12-31 08:26:29	1900-01-01 04:30:32
2008	Beto Lopes Dias	M	2	45	1899-12-31 04:38:33	1899-12-31 06:58:20	1899-12-31 10:20:08	1899-12-31 09:48:24	1900-01-01 07:45:25
2008	Gary Wang	M	2	41	1899-12-31 03:03:45	1899-12-31 06:21:21	1899-12-31 10:20:18	1899-12-31 09:51:16	1900-01-01 05:36:40
2008	Martin Raymond	M	2	46	1899-12-31 03:29:35	1899-12-31 07:16:28	1899-12-31 10:20:26	1899-12-31 09:44:11	1900-01-01 06:50:40
2008	Mark Ford	M	2	46	1899-12-31 03:37:31	1899-12-31 06:31:46	1899-12-31 10:20:30	1899-12-31 09:05:38	1900-01-01 05:35:25
2008	Brian Smallwood	M	2	53	1899-12-31 03:37:34	1899-12-31 06:58:41	1899-12-31 10:20:30	1899-12-31 09:22:27	1900-01-01 06:19:12
2008	Duane Franks	M	2	49	1899-12-31 03:04:51	1899-12-31 07:06:09	1899-12-31 10:21:05	1899-12-31 08:49:45	1900-01-01 06:36:49
2008	Warren Hollinger	M	2	43	1899-12-31 03:08:09	1899-12-31 07:07:12	1899-12-31 10:21:11	1899-12-31 09:57:01	1900-01-01 07:24:24
2008	Dan Bodden	M	2	41	1899-12-31 04:53:23	1899-12-31 06:36:04	1899-12-31 10:21:43	1899-12-31 07:23:09	1900-01-01 09:26:19
2008	Roland Patzina	M	2	42	1899-12-31 04:35:48	1899-12-31 07:03:59	1899-12-31 10:21:46	1899-12-31 09:17:55	1900-01-01 07:32:24
2008	Stephen Dewald	M	2	40	1899-12-31 03:17:50	1899-12-31 06:55:34	1899-12-31 10:21:48	1899-12-31 10:29:17	1900-01-01 06:16:05
2008	Darwin Holt	M	2	46	1899-12-31 04:19:48	1899-12-31 07:03:27	1899-12-31 10:22:00	1899-12-31 09:35:14	1900-01-01 07:20:29
2008	Todd Crandell	M	2	41	1899-12-31 04:00:46	1899-12-31 06:17:33	1899-12-31 10:23:50	1899-12-31 09:23:49	1900-01-01 05:44:53
1986	Gary Rogers	M	2	29	1899-12-31 03:35:51	1899-12-31 07:44:45	1899-12-31 10:23:55	1899-12-31 09:33:33	1900-01-01 07:18:04
2008	Jason Lester	M	2	34	3:56:33	6:00:24	1899-12-31 10:23:55	9:31:51	1900-01-01 05:52:43
2008	Cory Foulk	M	2	49	1899-12-31 04:04:41	1899-12-31 06:24:25	1899-12-31 10:24:02	1899-12-31 09:00:06	1900-01-01 05:53:14
2008	Paulo Calil	M	2	36	1899-12-31 03:12:22	1899-12-31 07:36:08	1899-12-31 10:24:19	1899-12-31 09:18:58	1900-01-01 08:32:38
1984	Willy Mccarty	M	2	37	1899-12-31 03:30:44	1899-12-31 07:36:50	1899-12-31 10:25:17	1899-12-31 11:34:24	1900-01-01 09:07:15
2008	Bill Bradley	M	2	48	1899-12-31 04:32:15	1899-12-31 07:10:14	1899-12-31 10:25:20	1899-12-31 06:38:53	1900-01-01 07:38:36
2008	Riccardo Alessi	M	2	38	1899-12-31 03:57:02	1899-12-31 06:02:15	1899-12-31 10:25:42	1899-12-31 10:52:24	1900-01-01 07:17:23
2009	Miro Kregar	M	2	47	1899-12-31 04:06:29	1899-12-31 07:29:36	1899-12-31 10:26:14	1899-12-31 11:41:28	1900-01-01 09:43:47
2008	Alexandre Luna Freire	M	2	42	1899-12-31 05:12:34	1899-12-31 06:21:43	1899-12-31 10:26:31	1899-12-31 10:15:04	1900-01-01 08:15:52
2008	Vito Bialla	M	2	60	1899-12-31 04:37:23	1899-12-31 05:42:15	1899-12-31 10:26:31	1899-12-31 14:01:29	1900-01-01 10:47:38
2008	Gil Loomis	M	2	58	4:17:42	5:15:24	1899-12-31 10:26:44	8:09:41	1900-01-01 04:09:31
2009	Alexandre Ribeiro	M	2	44	1899-12-31 04:05:37	1899-12-31 06:40:41	1899-12-31 10:26:51	1899-12-31 10:25:27	1900-01-01 08:03:16
2009	Peter Kotland	M	2	37	1899-12-31 04:27:56	1899-12-31 06:26:11	1899-12-31 10:27:31	1899-12-31 10:23:10	1900-01-01 07:44:48
2009	Mike Le Roux	M	2	34	1899-12-31 03:31:00	1899-12-31 06:50:36	1899-12-31 10:27:35	1899-12-31 11:14:28	1900-01-01 08:03:39
2009	Jochen Dembeck	M	2	42	1899-12-31 04:54:04	1899-12-31 07:59:18	1899-12-31 10:27:56	1899-12-31 09:53:14	1900-01-01 09:14:32
2009	Nino Cokan	M	2	36	3:43:13	5:31:35	1899-12-31 10:28:25	9:01:58	1900-01-01 04:45:11
1985	James Budde	M	2	40	1899-12-31 03:32:00	1899-12-31 07:06:55	1899-12-31 10:28:30	1899-12-31 09:49:52	1900-01-01 06:57:17
2009	Mark Ford	M	2	47	1899-12-31 03:44:40	1899-12-31 06:47:57	1899-12-31 10:28:41	1899-12-31 11:01:20	1900-01-01 06:46:40
1986	Katsuo Shimada	M	2	28	1899-12-31 04:18:03	1899-12-31 07:26:58	1899-12-31 10:28:49	1899-12-31 11:20:44	1900-01-01 09:34:34
2009	Richard Roll	M	2	43	1899-12-31 03:02:59	1899-12-31 03:57:28	1899-12-31 10:28:57	1899-12-31 10:45:51	1900-01-01 04:15:15
2009	Gary Wang	M	2	42	1899-12-31 03:49:35	1899-12-31 07:23:34	1899-12-31 10:29:33	1899-12-31 08:17:13	1900-01-01 08:18:02
2009	Peter Mueller	M	2	47	1899-12-31 04:29:14	1899-12-31 07:41:08	1899-12-31 10:32:29	1899-12-31 10:28:02	1900-01-01 09:10:53
2009	Juan Craveri	M	2	41	1899-12-31 03:40:19	1899-12-31 06:34:51	1899-12-31 10:32:33	1899-12-31 09:19:01	1900-01-01 06:11:32
2009	Riccardo Alessi	M	2	39	1899-12-31 03:20:48	1899-12-31 08:19:52	1899-12-31 10:33:00	1899-12-31 11:37:03	1900-01-01 09:50:43
1984	Terry Ives	M	2	48	1899-12-31 03:09:38	1899-12-31 07:20:21	1899-12-31 10:33:21	1899-12-31 10:14:50	1900-01-01 07:18:10
2009	Jamie Patrick	M	2	39	1899-12-31 03:44:03	1899-12-31 06:31:04	1899-12-31 10:34:02	1899-12-31 08:12:17	1900-01-01 05:01:26
2009	Ulli Winkelmann	M	2	52	1899-12-31 04:33:26	1899-12-31 07:11:52	1899-12-31 10:34:03	1899-12-31 10:19:02	1900-01-01 08:38:23
2009	Jason Lester	M	2	35	1899-12-31 03:45:25	1899-12-31 05:17:00	1899-12-31 10:34:23	1899-12-31 12:55:06	1900-01-01 08:31:54
2009	William Conner	M	2	36	1899-12-31 04:21:25	1899-12-31 07:09:27	1899-12-31 10:35:04	1899-12-31 07:01:06	1900-01-01 09:29:30
2009	Roland Patzina	M	2	43	1899-12-31 04:03:09	1899-12-31 07:12:43	1899-12-31 10:35:48	1899-12-31 09:02:46	1900-01-01 06:54:00
1986	Gary Shields	M	2	31	1899-12-31 03:48:05	1899-12-31 07:34:39	1899-12-31 10:35:50	1899-12-31 11:42:07	1900-01-01 10:00:41
2009	Markus Joswig	M	2	28	1899-12-31 04:48:17	1899-12-31 07:37:09	1899-12-31 10:37:23	1899-12-31 07:37:47	1900-01-01 06:40:36
2009	Paulo Calil	M	2	37	1899-12-31 03:23:15	1899-12-31 05:56:25	1899-12-31 10:38:18	1899-12-31 09:05:07	1900-01-01 05:03:05
2009	Ellis Andrews	M	2	65	1899-12-31 03:45:21	1899-12-31 07:48:37	1899-12-31 10:38:20	1899-12-31 09:35:17	1900-01-01 07:47:35
1985	Kurt Madden	M	2	30	1899-12-31 03:36:09	1899-12-31 07:09:12	1899-12-31 10:38:25	1899-12-31 08:59:08	1900-01-01 06:22:54
2009	Stephen Dewald	M	2	41	1899-12-31 04:02:36	1899-12-31 07:15:39	1899-12-31 10:38:34	1899-12-31 08:06:51	1900-01-01 06:03:40
2009	Sean Mcfadden	M	2	29	2:54:47	5:48:06	1899-12-31 10:39:02	9:29:32	1900-01-01 04:51:27
1983	William Woodruff	M	2	34	1899-12-31 04:30:33	1899-12-31 07:29:26	1899-12-31 10:39:08	1899-12-31 10:36:16	1900-01-01 09:15:23
2009	Giorgio Alessi	M	2	44	1899-12-31 03:53:27	1899-12-31 06:28:30	1899-12-31 10:40:18	1899-12-31 08:56:52	1900-01-01 05:59:07
2010	Mike Le Roux	M	2	35	1899-12-31 03:39:56	1899-12-31 07:40:11	1899-12-31 10:40:36	1899-12-31 11:32:49	1900-01-01 09:33:32
2010	Slater Fletcher	M	2	33	1899-12-31 04:07:08	1899-12-31 07:02:28	1899-12-31 10:41:17	1899-12-31 07:07:20	1900-01-01 08:50:28
1984	Stephen Aglinskas	M	2	41	1899-12-31 03:49:56	1899-12-31 07:12:11	1899-12-31 10:41:20	1899-12-31 09:46:14	1900-01-01 07:29:41
2010	Jonas Colting	M	2	37	1899-12-31 04:31:34	1899-12-31 06:26:18	1899-12-31 10:41:34	1899-12-31 11:08:05	1900-01-01 08:29:35
2010	Alexandre Ribeiro	M	2	45	1899-12-31 04:19:25	1899-12-31 07:05:50	1899-12-31 10:41:50	1899-12-31 08:33:45	1900-01-01 07:13:18
2010	Christian Mcevoy	M	2	28	1899-12-31 03:45:44	1899-12-31 07:13:13	1899-12-31 10:42:07	1899-12-31 08:03:59	1900-01-01 06:38:28
1984	Kelly Kurakazu	M	2	26	1899-12-31 03:32:54	1899-12-31 07:11:41	1899-12-31 10:42:20	1899-12-31 08:51:53	1900-01-01 06:18:48
2010	Nino Cokan	M	2	37	1899-12-31 04:41:58	1899-12-31 06:34:05	1899-12-31 10:43:06	1899-12-31 15:03:41	1900-01-01 13:12:50
1985	Noble Beck	M	2	35	1899-12-31 04:29:17	1899-12-31 07:23:02	1899-12-31 10:44:43	1899-12-31 11:38:31	1900-01-01 10:15:33
2010	Gary Wang	M	2	43	4:05:21	5:44:35	1899-12-31 10:45:41	1899-12-31 10:14:18	1900-01-01 06:49:55
2010	Milton De Augusto	M	2	36	1899-12-31 02:56:25	1899-12-31 07:26:45	1899-12-31 10:45:42	1899-12-31 10:36:24	1900-01-01 07:45:16
2010	Markus Joswig	M	2	29	1899-12-31 05:26:36	1899-12-31 07:26:53	1899-12-31 10:45:46	1899-12-31 09:52:04	1900-01-01 09:31:19
2010	Carlos Conceicao	M	2	46	1899-12-31 04:17:13	1899-12-31 07:42:37	1899-12-31 10:45:57	1899-12-31 09:09:57	1900-01-01 08:41:19
2010	Christopher Draper	M	2	34	1899-12-31 04:51:05	1899-12-31 06:30:52	1899-12-31 10:46:22	1899-12-31 08:35:12	1900-01-01 06:43:31
2010	Wolfgang Schmidt	M	2	49	1899-12-31 04:00:07	1899-12-31 07:01:46	1899-12-31 10:46:34	1899-12-31 09:56:11	1900-01-01 07:44:38
2010	Scott Beasley	M	2	49	1899-12-31 03:43:18	1899-12-31 06:49:47	1899-12-31 10:46:54	1899-12-31 09:19:37	1900-01-01 06:39:36
1983	James Budde	M	2	38	1899-12-31 03:53:46	1899-12-31 07:25:55	1899-12-31 10:47:10	1899-12-31 11:13:30	1900-01-01 09:20:21
1983	Michael Moore	M	2	35	1899-12-31 03:13:47	1899-12-31 07:52:02	1899-12-31 10:47:14	1899-12-31 10:51:19	1900-01-01 08:44:22
2010	Adam Peruta	M	2	32	3:30:27	5:51:19	1899-12-31 10:47:37	1899-12-31 11:11:49	1900-01-01 07:21:12
2010	John Callos	M	2	48	1899-12-31 03:44:00	1899-12-31 07:48:01	1899-12-31 10:48:43	1899-12-31 08:34:10	1900-01-01 06:54:44
2010	Roland Patzina	M	2	44	1899-12-31 04:15:47	1899-12-31 06:19:12	1899-12-31 10:49:00	1899-12-31 10:46:36	1900-01-01 08:10:35
2010	Martin Raymond	M	2	48	1899-12-31 03:06:46	1899-12-31 06:02:04	1899-12-31 10:50:03	1899-12-31 09:40:28	1900-01-01 05:39:21
1984	Benjamin Fisher	M	2	27	1899-12-31 02:54:22	1899-12-31 07:30:28	1899-12-31 10:50:17	1899-12-31 10:10:15	1900-01-01 07:25:22
2010	Jason Lester	M	2	36	1899-12-31 05:00:00	1899-12-31 06:47:27	1899-12-31 10:50:27	1899-12-31 09:55:03	1900-01-01 08:32:57
2010	Simon Bourne	M	2	47	1899-12-31 04:06:36	1899-12-31 06:51:33	1899-12-31 10:50:31	1899-12-31 08:39:19	1900-01-01 07:37:43
2010	Cory Foulk	M	2	51	1899-12-31 03:39:04	1899-12-31 07:45:07	1899-12-31 10:50:49	1899-12-31 10:32:26	1900-01-01 08:47:26
2010	Mike Rouse	M	2	58	1899-12-31 04:23:45	1899-12-31 06:35:38	1899-12-31 10:50:54	1899-12-31 11:32:24	1900-01-01 09:22:41
2010	Robert Hillery	M	2	29	1899-12-31 04:00:33	1899-12-31 07:01:16	1899-12-31 10:51:07	1899-12-31 07:45:57	1900-01-01 08:03:33
2010	Paul Dalton	M	2	52	1899-12-31 04:02:25	1899-12-31 07:12:14	1899-12-31 10:51:27	1899-12-31 09:57:01	1900-01-01 08:05:20
2011	Jeremy Howard	M	2	31	1899-12-31 04:44:15	1899-12-31 07:14:08	1899-12-31 10:52:08	1899-12-31 12:40:41	1900-01-01 11:31:12
2011	Michael Coughlin	M	2	38	1899-12-31 05:16:41	1899-12-31 06:41:50	1899-12-31 10:52:14	1899-12-31 11:53:03	1900-01-01 10:43:00
2011	Miro Kregar	M	2	49	1899-12-31 03:20:42	1899-12-31 07:06:08	1899-12-31 10:52:26	1899-12-31 10:05:21	1900-01-01 07:24:37
2011	Alexandre Ribeiro	M	2	46	1899-12-31 04:44:25	1899-12-31 04:17:22	1899-12-31 10:52:29	1899-12-31 09:48:02	1900-01-01 05:42:18
2011	Nino Cokan	M	2	38	1899-12-31 04:11:22	1899-12-31 07:08:14	1899-12-31 10:52:50	1899-12-31 10:25:27	1900-01-01 08:26:58
2011	Sergio Meniconi	M	2	46	1899-12-31 04:31:12	1899-12-31 07:18:57	1899-12-31 10:54:01	1899-12-31 10:37:56	1900-01-01 09:22:06
2011	Milton Sousa	M	2	37	1899-12-31 03:15:24	1899-12-31 06:31:04	1899-12-31 10:54:40	1899-12-31 09:29:52	1900-01-01 06:11:00
2011	Gary Wang	M	2	44	1899-12-31 03:50:28	1899-12-31 07:28:07	1899-12-31 10:54:44	1899-12-31 07:12:07	1900-01-01 07:23:18
2011	Scott Gower	M	2	46	1899-12-31 03:10:08	1899-12-31 08:06:06	1899-12-31 10:55:25	1899-12-31 11:44:22	1900-01-01 09:56:01
2011	Christopher Draper	M	2	35	1899-12-31 03:05:15	1899-12-31 04:22:10	1899-12-31 10:55:35	1899-12-31 10:22:58	1900-01-01 04:45:58
1985	John Mathias	M	2	33	1899-12-31 03:58:49	1899-12-31 08:01:04	1899-12-31 10:55:39	1899-12-31 10:59:25	1900-01-01 09:54:57
2011	Kelly Duhig	M	2	43	1899-12-31 04:36:58	1899-12-31 06:58:34	1899-12-31 10:56:17	1899-12-31 10:11:34	1900-01-01 08:43:23
2011	Dan Squiller	M	2	54	1899-12-31 03:24:08	1899-12-31 07:49:24	1899-12-31 10:56:39	1899-12-31 09:35:48	1900-01-01 09:39:49
2011	Adam Peruta	M	2	33	1899-12-31 03:49:48	1899-12-31 07:29:40	1899-12-31 10:57:19	1899-12-31 11:37:18	1900-01-01 09:54:05
2011	Riccardo Alessi	M	2	41	1899-12-31 04:05:20	1899-12-31 09:00:00	1899-12-31 10:57:56	1899-12-31 10:45:55	1900-01-01 10:49:11
2011	Martin Raymond	M	2	49	1899-12-31 05:05:36	1899-12-31 06:43:21	1899-12-31 10:58:48	1899-12-31 08:48:14	1900-01-01 07:35:59
2011	Drake Tollenaar	M	2	42	1899-12-31 04:06:27	1899-12-31 07:29:39	1899-12-31 10:59:37	1899-12-31 07:07:20	1900-01-01 10:00:57
2011	Juan Craveri	M	2	43	1899-12-31 03:52:22	1899-12-31 06:57:36	1899-12-31 11:00:33	1899-12-31 10:21:41	1900-01-01 08:12:12
2011	Cory Foulk	M	2	52	1899-12-31 03:29:28	1899-12-31 07:15:58	1899-12-31 11:00:56	1899-12-31 08:17:14	1900-01-01 07:32:11
2011	Roland Patzina	M	2	45	1899-12-31 04:03:59	1899-12-31 07:13:17	1899-12-31 11:01:03	1899-12-31 09:42:57	1900-01-01 10:02:13
2011	Rusty Carter	M	2	36	3:51:10	6:49:25	1899-12-31 11:02:23	1899-12-31 10:07:51	1900-01-01 07:50:49
2011	David Wilson	M	2	65	1899-12-31 03:00:48	1899-12-31 07:40:53	1899-12-31 11:03:37	1899-12-31 07:48:34	1900-01-01 09:05:02
2011	Andres Traslosheros	M	2	41	1899-12-31 03:11:43	1899-12-31 07:15:33	1899-12-31 11:03:54	1899-12-31 10:00:10	1900-01-01 07:31:20
2012	Alexandre Ribeiro	M	2	47	1899-12-31 04:19:18	1899-12-31 07:16:59	1899-12-31 11:04:11	1899-12-31 08:46:27	1900-01-01 07:40:16
2011	Giorgio Alessi	M	2	46	1899-12-31 05:00:00	1899-12-31 07:00:00	1899-12-31 11:04:52	1899-12-31 09:14:39	1900-01-01 08:19:31
2012	Miro Kregar	M	2	50	4:27:28	5:40:00	1899-12-31 11:05:00	9:57:08	1900-01-01 07:09:36
2012	Tony O’Keeffe	M	2	51	1899-12-31 04:52:15	1899-12-31 06:48:07	1899-12-31 11:06:13	1899-12-31 09:38:12	1900-01-01 08:24:47
2012	Peter Mueller	M	2	50	1899-12-31 02:49:34	1899-12-31 07:11:28	1899-12-31 11:08:31	1899-12-31 11:10:09	1900-01-01 08:19:42
2012	Gary Wang	M	2	44	1899-12-31 03:56:38	1899-12-31 07:58:48	1899-12-31 11:08:42	1899-12-31 08:48:36	1900-01-01 09:51:21
2012	Christopher Draper	M	2	35	1899-12-31 04:16:14	1899-12-31 07:11:52	1899-12-31 11:09:47	1899-12-31 11:41:08	1900-01-01 10:19:01
2012	Mark Ford	M	2	50	1899-12-31 04:09:58	1899-12-31 07:16:41	1899-12-31 11:11:53	1899-12-31 11:54:16	1900-01-01 10:32:48
1983	A Tocco	M	2	48	1899-12-31 03:16:49	1899-12-31 08:20:54	1899-12-31 11:12:08	1899-12-31 11:31:00	1900-01-01 10:20:51
2012	Nino Cokan	M	2	39	1899-12-31 04:06:00	1899-12-31 06:51:52	1899-12-31 11:12:34	1899-12-31 11:05:16	1900-01-01 09:01:23
2012	Juan Craveri	M	2	44	1899-12-31 03:46:43	1899-12-31 06:19:25	1899-12-31 11:13:00	1899-12-31 10:35:29	1900-01-01 07:54:37
2012	Adam Peruta	M	2	34	1899-12-31 04:19:06	1899-12-31 07:29:57	1899-12-31 11:13:01	1899-12-31 09:15:23	1900-01-01 08:17:27
2012	Roberto Parseghian	M	2	42	1899-12-31 04:29:32	1899-12-31 09:10:50	1899-12-31 11:13:35	1899-12-31 10:33:20	1900-01-01 11:27:17
2012	Kevin Becker	M	2	48	1899-12-31 04:29:00	1899-12-31 09:11:01	1899-12-31 11:13:35	1899-12-31 11:21:31	1900-01-01 12:15:07
2012	Alan Macpherson	M	2	39	1899-12-31 04:26:05	1899-12-31 07:33:45	1899-12-31 11:14:06	1899-12-31 09:11:04	1900-01-01 07:50:17
2012	Tim Robert	M	2	47	1899-12-31 05:10:26	1899-12-31 08:45:57	1899-12-31 11:14:07	1899-12-31 12:03:34	1900-01-01 13:14:04
1984	Rudolph Isenschmid	M	2	32	1899-12-31 04:21:28	1899-12-31 07:21:46	1899-12-31 11:14:18	1899-12-31 09:11:05	1900-01-01 08:08:37
2012	Michael Brown	M	2	39	3:51:12	5:59:37	1899-12-31 11:15:23	1899-12-31 11:08:10	1900-01-01 08:14:22
2012	Rusty Carter	M	2	37	1899-12-31 03:50:16	1899-12-31 06:45:47	1899-12-31 11:16:24	1899-12-31 10:33:10	1900-01-01 08:25:37
2012	Michael Deitchman	M	2	36	1899-12-31 04:04:41	1899-12-31 06:44:45	1899-12-31 11:16:40	1899-12-31 10:10:26	1900-01-01 08:16:32
2012	Roland Patzina	M	2	46	1899-12-31 04:19:00	1899-12-31 07:40:58	1899-12-31 11:17:20	1899-12-31 09:38:13	1900-01-01 10:39:43
2012	Martin Raymond	M	2	50	1899-12-31 04:28:06	1899-12-31 06:45:37	1899-12-31 11:17:53	1899-12-31 10:37:49	1900-01-01 09:09:25
2012	Vito Rubino	M	2	34	1899-12-31 03:34:30	1899-12-31 04:10:39	1899-12-31 11:18:05	1899-12-31 08:01:21	1900-01-01 03:04:35
2013	Alexandre Ribeiro	M	2	48	1899-12-31 04:09:14	1899-12-31 07:21:12	1899-12-31 11:18:07	1899-12-31 08:49:39	1900-01-01 10:20:58
2013	Miro Kregar	M	2	51	1899-12-31 03:56:15	1899-12-31 06:58:44	1899-12-31 11:18:27	1899-12-31 08:28:20	1900-01-01 08:33:34
1983	Stuart Middleman	M	2	32	1899-12-31 04:18:30	1899-12-31 07:41:27	1899-12-31 11:20:00	1899-12-31 10:53:10	1900-01-01 10:13:07
2013	Tim Sheeper	M	2	50	1899-12-31 05:22:30	1899-12-31 08:48:33	1899-12-31 11:21:31	1899-12-31 10:21:48	1900-01-01 11:54:22
2013	Christian Isakson	M	2	40	1899-12-31 04:21:26	1899-12-31 09:29:10	1899-12-31 11:21:51	1899-12-31 12:56:31	1900-01-01 14:08:58
2013	Kurt Madden	M	2	58	1899-12-31 03:39:10	1899-12-31 07:44:46	1899-12-31 11:22:29	1899-12-31 08:41:43	1900-01-01 09:02:06
2013	Milton Sousa	M	2	39	3:36:57	7:32:23	1899-12-31 11:22:32	1899-12-31 10:29:15	1900-01-01 09:01:07
2013	Christopher Draper	M	2	36	4:42:11	6:16:52	1899-12-31 11:23:43	1899-12-31 11:35:22	1900-01-01 09:58:08
2013	James Player	M	2	41	1899-12-31 02:35:47	1899-12-31 06:38:18	1899-12-31 11:24:07	1899-12-31 09:31:20	1900-01-01 06:09:32
2013	Roberto Parseghian	M	2	43	1899-12-31 03:45:57	1899-12-31 07:54:12	1899-12-31 11:24:09	1899-12-31 08:02:50	1900-01-01 10:09:34
2013	Toni Marsal Bonet	M	2	33	1899-12-31 04:58:28	1899-12-31 06:56:56	1899-12-31 11:24:28	1899-12-31 09:40:53	1900-01-01 11:06:52
2013	Gary Wang	M	2	45	1899-12-31 04:02:46	1899-12-31 07:49:53	1899-12-31 11:25:00	1899-12-31 11:45:26	1900-01-01 11:03:05
1983	Fred Hornbruch	M	2	41	1899-12-31 04:15:05	1899-12-31 07:38:38	1899-12-31 11:25:14	1899-12-31 11:23:30	1900-01-01 10:42:27
2013	Alexandre Tremel	M	2	41	1899-12-31 03:47:25	1899-12-31 07:11:15	1899-12-31 11:25:35	1899-12-31 11:26:58	1900-01-01 09:51:13
2013	Jochen Dembeck	M	2	46	1899-12-31 04:49:49	1899-12-31 06:44:32	1899-12-31 11:25:50	1899-12-31 10:41:33	1900-01-01 09:41:44
2013	Peter Mueller	M	2	51	1899-12-31 04:04:40	1899-12-31 06:25:32	1899-12-31 11:26:28	1899-12-31 09:46:52	1900-01-01 07:43:32
2013	Keith Bergh	M	2	26	3:48:23	6:00:58	1899-12-31 11:26:56	9:48:03	1900-01-01 07:04:20
2013	Roland Patzina	M	2	47	1899-12-31 05:06:42	1899-12-31 07:04:52	1899-12-31 11:27:14	1899-12-31 10:39:38	1900-01-01 10:18:26
2013	Scott James	M	2	45	1899-12-31 05:00:00	1899-12-31 06:56:09	1899-12-31 11:27:18	1899-12-31 11:49:10	1900-01-01 11:12:37
1985	Clare St.Arnaud	M	2	47	1899-12-31 04:05:40	1899-12-31 07:45:52	1899-12-31 11:27:39	1899-12-31 11:57:03	1900-01-01 11:16:14
2013	Scott Mcdermott	M	2	44	1899-12-31 04:13:17	1899-12-31 07:16:26	1899-12-31 11:27:58	1899-12-31 10:56:46	1900-01-01 09:54:27
2013	Martin Raymond	M	2	51	1899-12-31 03:41:50	1899-12-31 07:53:31	1899-12-31 11:29:51	1899-12-31 11:12:43	1900-01-01 10:17:55
2013	Jason Nixon	M	2	50	1899-12-31 05:41:47	1899-12-31 06:44:10	1899-12-31 11:32:05	1899-12-31 13:08:21	1900-01-01 13:06:23
2013	Nacho Lombo Moruno	M	2	47	1899-12-31 03:47:02	1899-12-31 07:25:25	1899-12-31 11:32:14	1899-12-31 08:29:34	1900-01-01 07:14:15
2013	Rusty Carter	M	2	38	3:41:58	5:53:23	1899-12-31 11:33:23	9:05:48	1900-01-01 06:14:32
2013	Lars Heurich	M	2	34	1899-12-31 03:37:42	1899-12-31 06:33:26	1899-12-31 11:35:46	1899-12-31 11:41:55	1900-01-01 09:28:49
2014	Tobias Winnemoeller	M	2	35	1899-12-31 04:24:07	1899-12-31 07:16:28	1899-12-31 11:35:56	1899-12-31 10:21:21	1900-01-01 10:34:56
2014	Craig Percival	M	2	43	1899-12-31 04:37:15	1899-12-31 07:26:16	1899-12-31 11:36:32	1899-12-31 10:09:00	1900-01-01 09:49:03
1986	James Freim	M	2	40	1899-12-31 03:58:56	1899-12-31 07:30:32	1899-12-31 11:36:46	1899-12-31 09:25:32	1900-01-01 08:31:46
1986	Joseph Donatucci	M	2	33	1899-12-31 04:12:46	1899-12-31 07:20:18	1899-12-31 11:36:55	1899-12-31 10:51:55	1900-01-01 10:01:54
1986	Tomoya Takaishi	M	2	44	1899-12-31 04:11:47	1899-12-31 07:42:54	1899-12-31 11:36:56	1899-12-31 11:32:45	1900-01-01 11:04:22
2014	Miro Kregar	M	2	52	1899-12-31 03:32:18	1899-12-31 07:36:40	1899-12-31 11:37:02	1899-12-31 09:18:17	1900-01-01 10:23:58
2014	Tony Okeeffe	M	2	53	3:28:37	6:10:28	1899-12-31 11:37:37	1899-12-31 11:13:09	1900-01-01 08:29:51
1986	Stephen Anderson	M	2	24	1899-12-31 04:13:57	1899-12-31 07:32:17	1899-12-31 11:37:52	1899-12-31 11:19:08	1900-01-01 10:43:14
1985	Wally Aniban	M	2	43	1899-12-31 04:12:34	1899-12-31 07:36:54	1899-12-31 11:38:44	1899-12-31 11:29:04	1900-01-01 10:57:16
2014	Nick Logan	M	2	33	1899-12-31 03:59:26	1899-12-31 08:13:26	1899-12-31 11:39:19	1899-12-31 09:23:13	1900-01-01 09:15:24
2014	Peter Kotland	M	2	42	1899-12-31 04:39:43	1899-12-31 08:11:58	1899-12-31 11:39:29	1899-12-31 10:48:41	1900-01-01 11:19:51
1984	Peter Bourne	M	2	33	1899-12-31 03:22:00	1899-12-31 08:16:09	1899-12-31 11:43:17	1899-12-31 09:54:37	1900-01-01 09:16:03
2014	Andre Kajlich	M	2	35	1899-12-31 05:05:50	1899-12-31 05:24:39	1899-12-31 11:43:45	1899-12-31 12:04:27	1900-01-01 10:18:41
2014	Keith Bergh	M	2	27	1899-12-31 03:48:28	1899-12-31 07:12:02	1899-12-31 11:44:47	1899-12-31 08:03:45	1900-01-01 06:49:02
2014	Peter Mueller	M	2	52	1899-12-31 05:34:51	1899-12-31 06:28:55	1899-12-31 11:44:51	1899-12-31 11:42:13	1900-01-01 11:30:50
1986	James Budde	M	2	41	1899-12-31 02:43:04	1899-12-31 08:08:49	1899-12-31 11:44:53	1899-12-31 09:54:03	1900-01-01 08:30:49
2014	Gary Wang	M	2	46	1899-12-31 04:35:35	1899-12-31 07:24:08	1899-12-31 11:45:15	1899-12-31 11:25:16	1900-01-01 11:10:14
2014	Juan Craveri	M	2	46	4:44:05	6:47:05	1899-12-31 11:46:44	1899-12-31 11:59:59	1900-01-01 11:17:53
2014	Valenti Sanjuan	M	2	33	1899-12-31 04:18:46	1899-12-31 07:05:12	1899-12-31 11:51:59	1899-12-31 12:54:37	1900-01-01 12:10:34
2014	John Howerton	M	2	34	1899-12-31 03:57:36	1899-12-31 07:38:05	1899-12-31 11:57:38	1899-12-31 10:35:11	1900-01-01 10:08:00
2014	Kevin Becker	M	2	50	1899-12-31 04:19:14	1899-12-31 04:44:34	1899-12-31 11:57:48	1899-12-31 09:24:09	1900-01-01 06:25:45
2014	Scott James	M	2	46	1899-12-31 04:30:08	1899-12-31 07:28:02	1899-12-31 12:00:00	1899-12-31 10:47:29	1900-01-01 10:45:39
2014	Giancarlo Matarazzo	M	2	53	1899-12-31 05:41:31	1899-12-31 08:21:49	1899-12-31 12:00:53	1899-12-31 08:53:38	1900-01-01 10:57:51
2014	Pedro Paixao	M	2	41	1899-12-31 05:24:46	1899-12-31 08:43:45	1899-12-31 12:02:09	1899-12-31 10:23:05	1900-01-01 12:33:45
2014	Antonio Nascimento	M	2	44	1899-12-31 04:53:25	1899-12-31 07:55:04	1899-12-31 12:03:20	1899-12-31 08:27:30	1900-01-01 09:19:19
2014	Matthew Phelan	M	2	37	1899-12-31 03:34:42	1899-12-31 07:51:03	1899-12-31 12:03:51	1899-12-31 12:00:03	1900-01-01 11:29:39
2014	Martin Raymond	M	2	52	1899-12-31 04:32:32	1899-12-31 08:02:10	1899-12-31 12:04:22	1899-12-31 13:29:26	1900-01-01 14:18:30
2014	Ernest Castella	M	2	45	1899-12-31 05:16:11	1899-12-31 09:30:35	1899-12-31 12:04:29	1899-12-31 08:52:50	1900-01-01 11:44:05
2014	Roland Patzina	M	2	48	1899-12-31 04:06:56	1899-12-31 06:53:50	1899-12-31 12:04:31	1899-12-31 14:55:27	1900-01-01 14:00:44
2014	Stephen Cosgrove	M	2	51	1899-12-31 03:16:11	1899-12-31 07:59:56	1899-12-31 12:08:42	1899-12-31 11:16:40	1900-01-01 10:41:29
2015	Mike Couglin	M	2	42	1899-12-31 05:49:12	1899-12-31 08:33:06	1899-12-31 12:15:05	1899-12-31 11:09:08	1900-01-01 13:46:31
2014	Tony Horton	M	2	51	1899-12-31 04:29:34	1899-12-31 08:05:09	1899-12-31 12:15:44	1899-12-31 10:27:45	1900-01-01 11:18:12
2015	David Kalinowski	M	2	29	1899-12-31 04:20:11	1899-12-31 04:42:27	1899-12-31 12:23:28	1899-12-31 12:47:16	1900-01-01 11:13:32
2015	Jeremy Howard	M	2	35	1899-12-31 03:39:49	1899-12-31 08:03:15	1899-12-31 12:26:47	1899-12-31 14:06:54	1900-01-01 14:16:45
2015	Tony Okeeffe	M	2	54	1899-12-31 05:28:29	1899-12-31 09:01:38	1899-12-31 12:27:14	1899-12-31 12:27:27	1900-01-01 15:24:48
2015	Miro Kregar	M	2	53	1899-12-31 04:59:34	1899-12-31 09:28:33	1899-12-31 12:28:02	1899-12-31 13:36:13	1900-01-01 16:30:22
2015	Billy Edwards	M	2	38	1899-12-31 05:38:00	1899-12-31 07:00:42	1899-12-31 12:29:55	1899-12-31 14:07:23	1900-01-01 15:16:00
2015	Travis Wayth	M	2	45	1899-12-31 04:56:54	1899-12-31 07:53:43	1899-12-31 12:31:33	1899-12-31 10:57:12	1900-01-01 12:19:22
2015	Kevin Willis	M	2	55	1899-12-31 03:40:29	1899-12-31 07:54:32	1899-12-31 12:31:38	1899-12-31 12:34:54	1900-01-01 12:41:33
2015	Michael Owen	M	2	31	1899-12-31 03:42:27	1899-12-31 04:32:13	1899-12-31 12:36:31	1899-12-31 11:04:10	1900-01-01 07:55:21
2015	Jochen Dembeck	M	2	48	1899-12-31 05:57:00	1899-12-31 09:25:14	1899-12-31 12:38:16	1899-12-31 11:31:42	1900-01-01 15:32:12
2015	Chris Draper	M	2	39	1899-12-31 05:09:10	1899-12-31 08:14:21	1899-12-31 12:44:15	1899-12-31 11:09:07	1900-01-01 13:16:53
2015	Toni Marsal	M	2	34	1899-12-31 04:17:37	1899-12-31 08:31:21	1899-12-31 12:44:45	1899-12-31 12:34:53	1900-01-01 14:08:36
2015	Inaki De La Parra Barreras	M	2	32	1899-12-31 04:33:25	1899-12-31 08:17:56	1899-12-31 12:46:17	1899-12-31 12:00:04	1900-01-01 13:37:42
2015	Adam Fox	M	2	35	1899-12-31 03:02:23	1899-12-31 10:41:03	1899-12-31 12:46:47	1899-12-31 10:59:39	1900-01-01 13:29:52
2015	Peter Mueller	M	2	53	1899-12-31 04:21:23	1899-12-31 09:40:28	1899-12-31 12:48:52	1899-12-31 11:44:37	1900-01-01 14:35:20
2015	John Howerton	M	2	35	1899-12-31 05:28:47	1899-12-31 08:48:14	1899-12-31 12:51:18	1899-12-31 14:45:37	1900-01-01 17:43:56
1983	Kurt Madden	M	2	28	1899-12-31 04:24:04	1899-12-31 06:38:59	1899-12-31 12:56:55	1899-12-31 11:59:59	1900-01-01 11:59:57
2015	Peter Hudson	M	2	36	1899-12-31 04:18:14	1899-12-31 07:49:29	1899-12-31 12:58:47	1899-12-31 12:32:11	1900-01-01 13:38:41
2015	Gary Wang	M	2	48	1899-12-31 04:07:16	1899-12-31 08:24:03	1899-12-31 13:00:58	1899-12-31 12:25:59	1900-01-01 13:58:16
2015	Kevin Becker	M	2	51	1899-12-31 04:05:06	1899-12-31 04:18:58	1899-12-31 13:01:14	1899-12-31 11:47:56	1900-01-01 09:13:14
2015	Matthew Phelen	M	2	38	1899-12-31 04:12:16	1899-12-31 04:27:41	1899-12-31 13:03:59	1899-12-31 11:15:09	1900-01-01 08:59:05
2015	Giancarlo Matarazzo	M	2	54	1899-12-31 03:53:15	1899-12-31 07:11:37	1899-12-31 13:09:03	1899-12-31 12:20:03	1900-01-01 12:34:02
2015	Greg Pelton	M	2	54	1899-12-31 05:10:28	1899-12-31 09:01:41	1899-12-31 13:12:04	1899-12-31 13:30:04	1900-01-01 16:54:17
2015	Miguel Angel Tortajada Buj	M	2	30	1899-12-31 04:50:53	1899-12-31 08:43:53	1899-12-31 13:19:23	1899-12-31 11:09:31	1900-01-01 14:03:24
2015	Roland Patzina	M	2	49	1899-12-31 04:13:38	1899-12-31 09:09:54	1899-12-31 13:26:58	1899-12-31 15:01:55	1900-01-01 17:52:25
2015	Peter Lopinski	M	2	45	1899-12-31 05:12:32	1899-12-31 06:29:22	1899-12-31 13:36:22	1899-12-31 10:22:49	1900-01-01 11:41:14
2015	Will Rogers	M	2	56	1899-12-31 03:32:34	1899-12-31 05:50:01	1899-12-31 16:00:00	1899-12-31 13:15:35	1900-01-01 14:38:10
1988	Masafumi Ogura	M	2	40	2:40:30	5:04:06	7:55:00	6:40:50	1899-12-31 22:20:26
1989	Harunobu Azuma	M	2	35	2:45:21	5:36:18	8:08:01	7:11:25	1899-12-31 23:41:05
1989	Jim Orr	M	2	42	2:46:59	4:34:02	8:13:09	7:10:20	1899-12-31 22:44:30
1990	Peter Holenweg	M	2	33	2:48:24	5:49:45	8:23:40	8:00:45	1900-01-01 01:02:34
1990	Shigeo Chiba	M	2	42	3:25:51	5:18:20	8:31:45	9:19:45	1900-01-01 02:35:41
1993	Shoichi Tsukamoto	M	2	27	2:57:41	4:36:49	8:45:30	6:55:58	1899-12-31 23:15:58
1993	Yoichi Shimazaki	M	2	32	2:44:50	4:20:08	8:47:58	7:32:00	1899-12-31 23:24:56
1994	Muneo Iwasaki	M	2	30	2:48:31	4:23:00	8:49:49	7:56:51	1899-12-31 23:58:11
1995	Hans-Joachim Dilg	M	2	37	3:12:31	4:52:28	8:58:37	7:52:16	1900-01-01 00:55:52
1996	Erik Seedhouse	M	2	32	3:14:56	4:28:11	9:00:49	8:59:26	1900-01-01 01:43:22
1998	Uli Weber	M	2	49	3:34:12	4:34:32	9:13:40	9:25:18	1900-01-01 02:47:42
1998	Mel Long	M	2	35	2:52:53	5:05:38	9:20:01	8:16:34	1900-01-01 01:35:06
1999	Fritz Scheil	M	2	39	3:03:51	5:19:46	9:22:05	9:19:44	1900-01-01 03:05:26
1999	Michael Hargrove	M	2	51	3:11:12	4:42:47	9:28:41	7:04:57	1900-01-01 00:27:37
2000	Joseph Zwack	M	2	40	2:46:37	6:28:35	9:31:28	8:45:11	1900-01-01 03:31:51
2000	Vito Bialla	M	2	52	3:27:58	4:56:11	9:35:50	8:50:32	1900-01-01 02:50:31
2001	Sergio Venezuela	M	2	29	4:08:59	6:59:30	9:38:53	1899-12-31 10:24:38	1900-01-01 07:12:00
2002	Ulli Winkelmann	M	2	45	3:28:57	4:45:26	9:44:38	1899-12-31 10:09:29	1900-01-01 04:08:30
2003	Alexandre Ribeiro	M	2	38	2:59:10	4:57:30	9:47:24	1899-12-31 10:12:50	1900-01-01 03:56:54
2004	Tony O'Keeffe	M	2	43	2:25:33	6:08:37	9:52:40	1899-12-31 11:15:07	1900-01-01 05:41:57
2005	Philip Ramsey	M	2	39	4:05:43	4:54:45	9:59:01	8:37:26	1900-01-01 03:36:55
